# Supplementary material for: Phosphorylation Stoichiometries of Human Eukaryotic Initiation Factors
Source: Int J Mol Sci. 2014 Jun 27;15(7):11523–38. doi: 10.3390/ijms150711523 (PMC4139797; doi:10.3390/ijms150711523)

## Supplementary Information

**Figure S1.** Spectrum corresponding to the quantification of phosphorylation of Thr-31 for eIF2 $\beta$ . Inset in upper right corner is a zoom in view of the reporter TMT (tandem mass tag) ions.

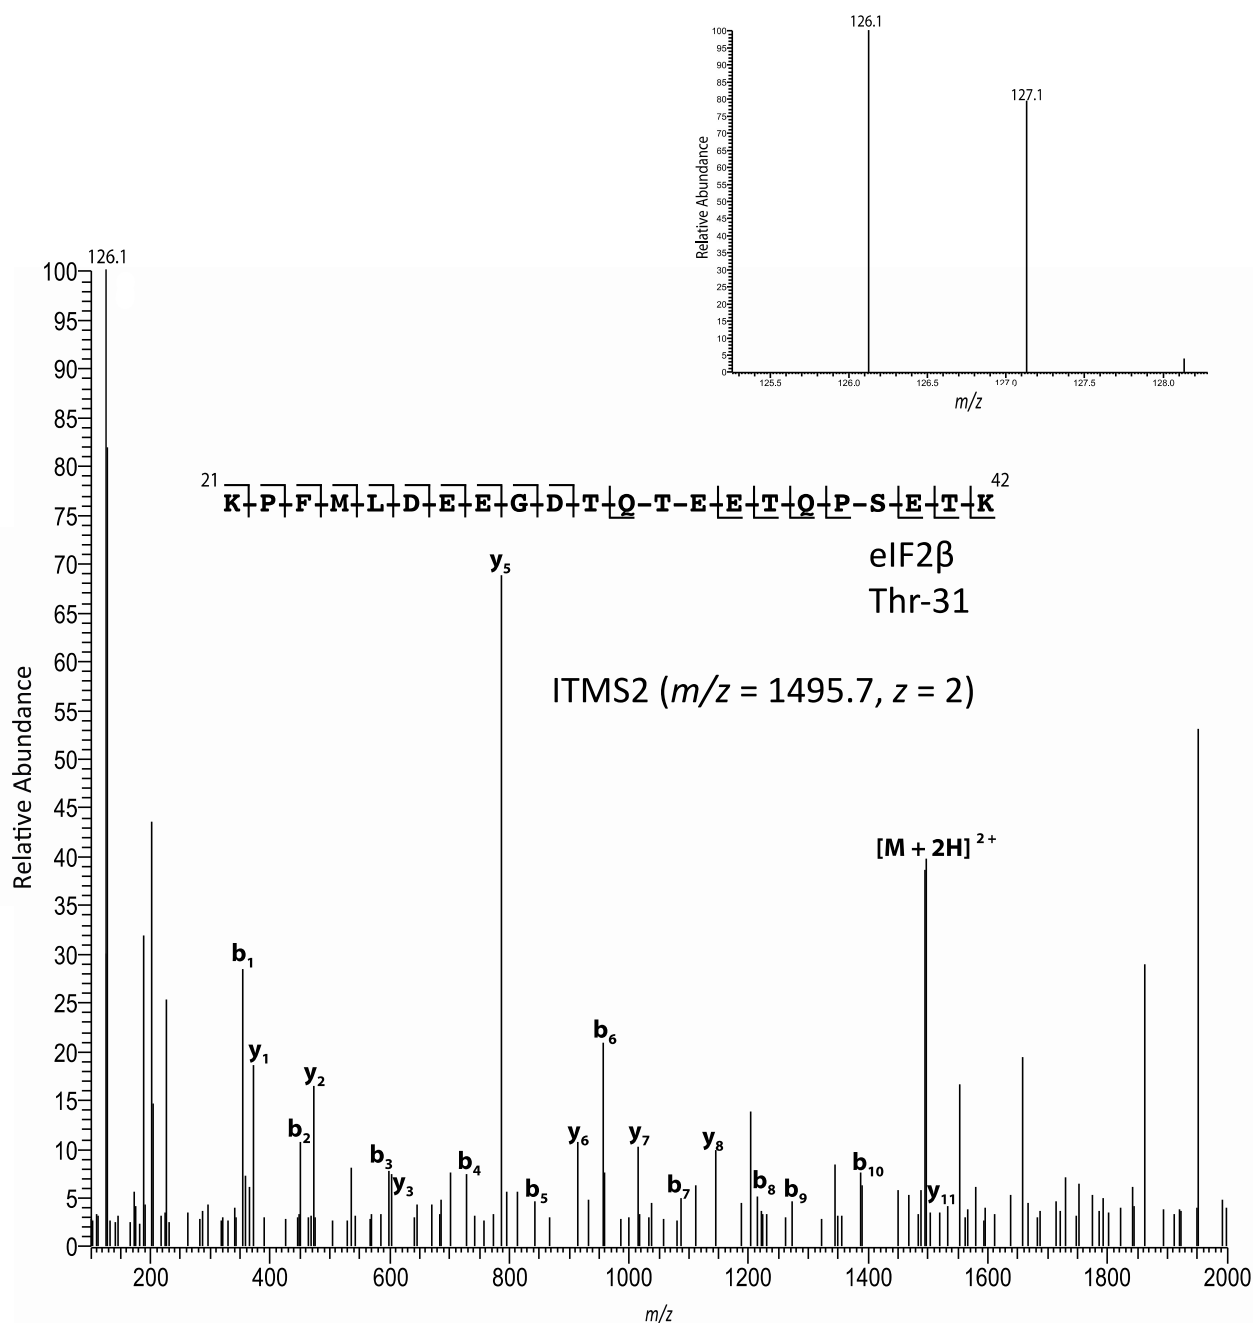

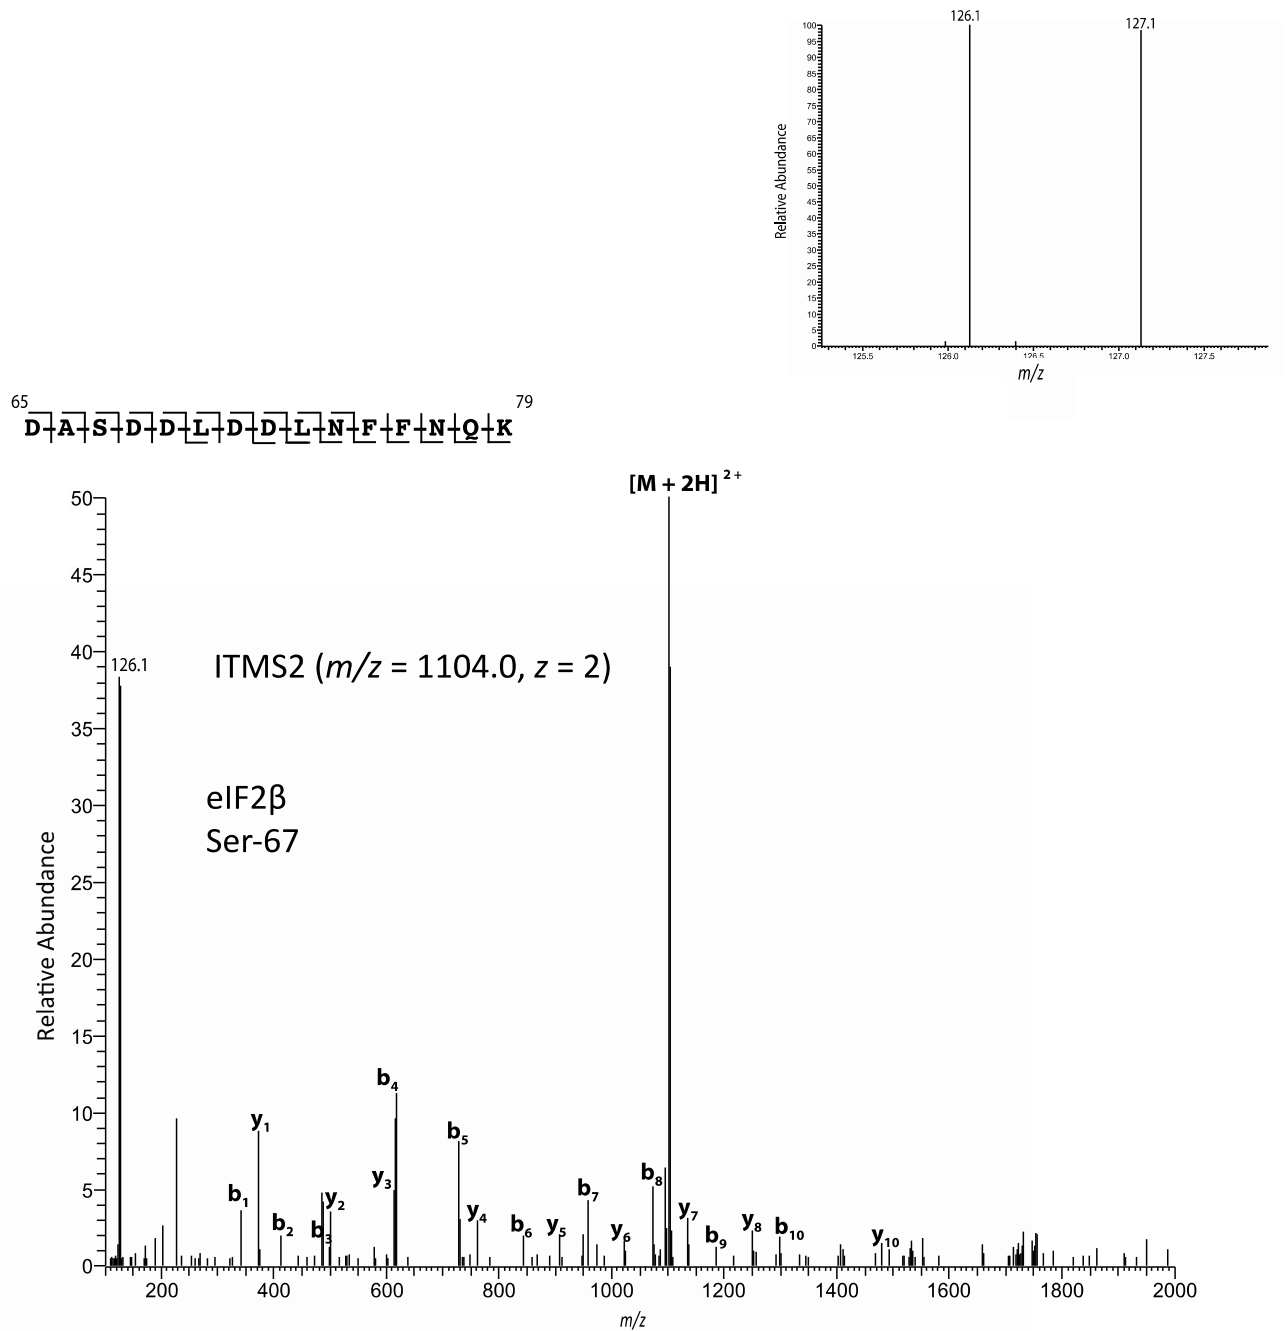

**Figure S3.** Spectrum corresponding to the quantification of phosphorylation of Ser-105 and Thr-111 for eIF2 $\beta$ . Inset in upper right corner is a zoom in view of the reporter TMT ions.

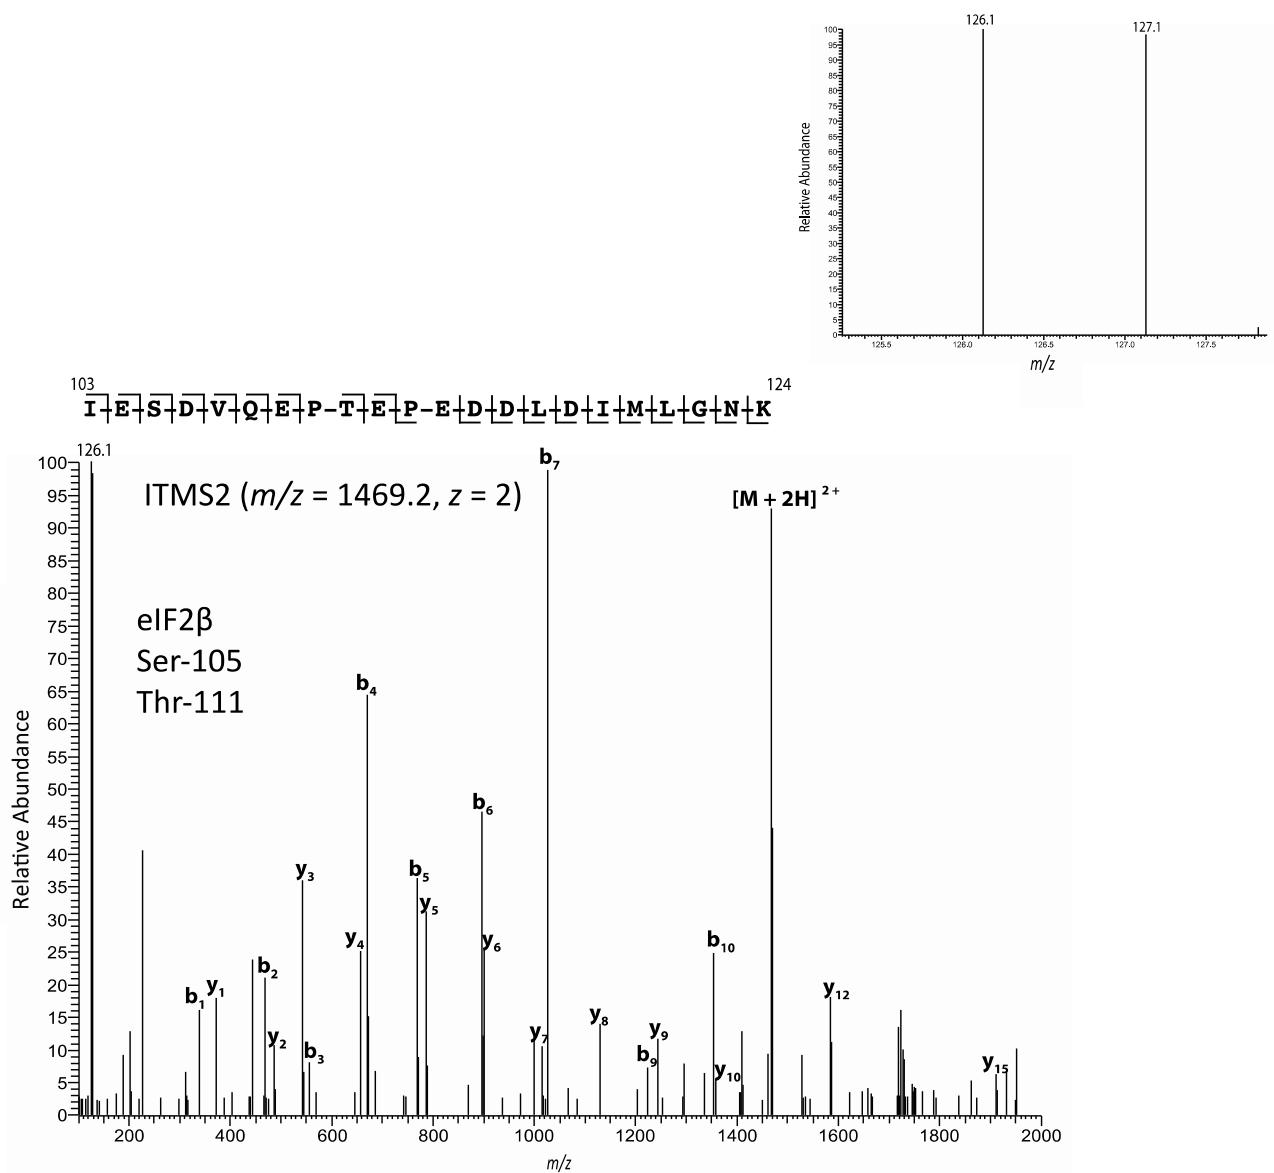

**Figure S4.** Spectrum corresponding to the quantification of phosphorylation of Ser-158 for eIF2 $\beta$ . Inset in upper right corner is a zoom in view of the reporter TMT ions.

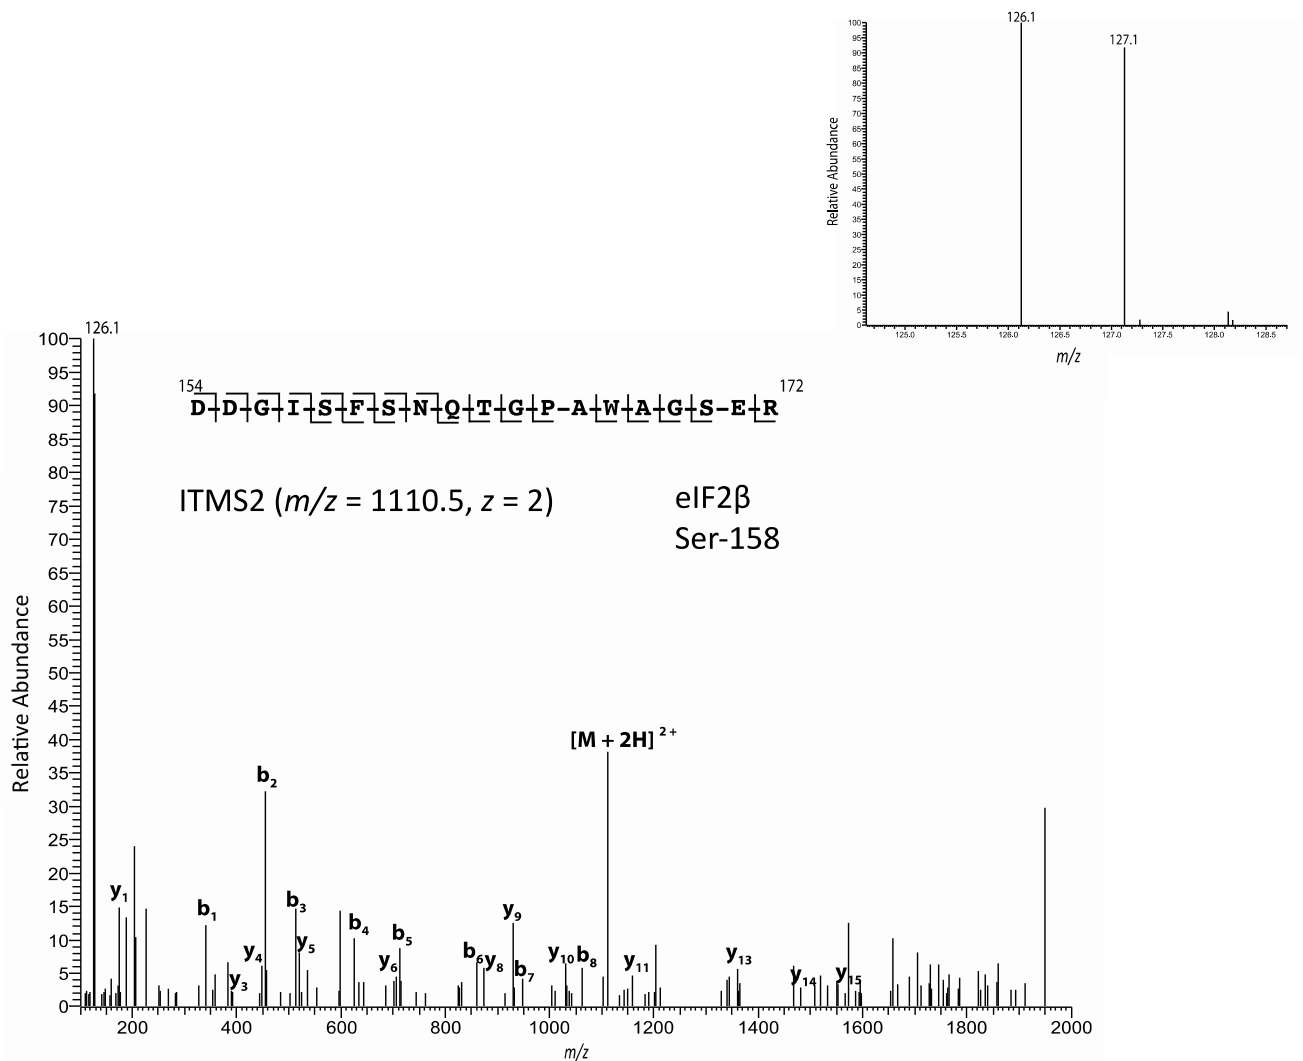

**Figure S5.** Spectrum corresponding to the quantification of phosphorylation of Ser-55 and Thr-56 for eIF2 $\gamma$ . Inset in upper right corner is a zoom in view of the reporter TMT ions.

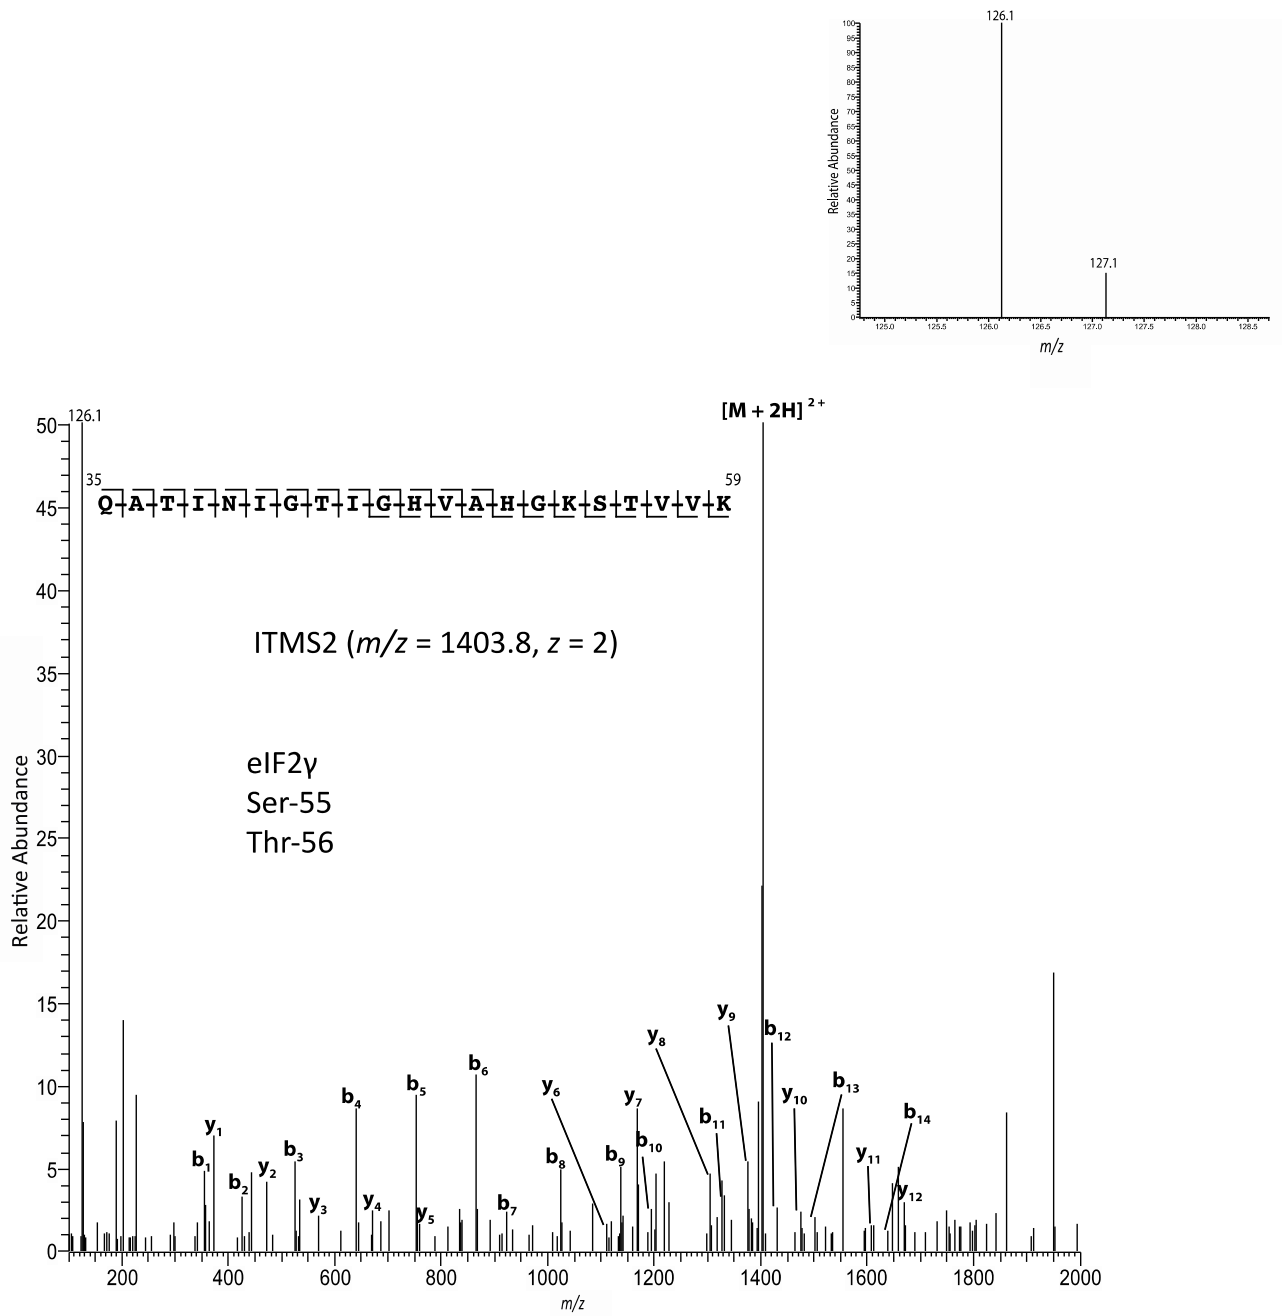

**Figure S6.** Spectrum corresponding to the quantification of phosphorylation of Thr-109 for eIF2 $\gamma$ . Inset in upper right corner is a zoom in view of the reporter TMT ions.

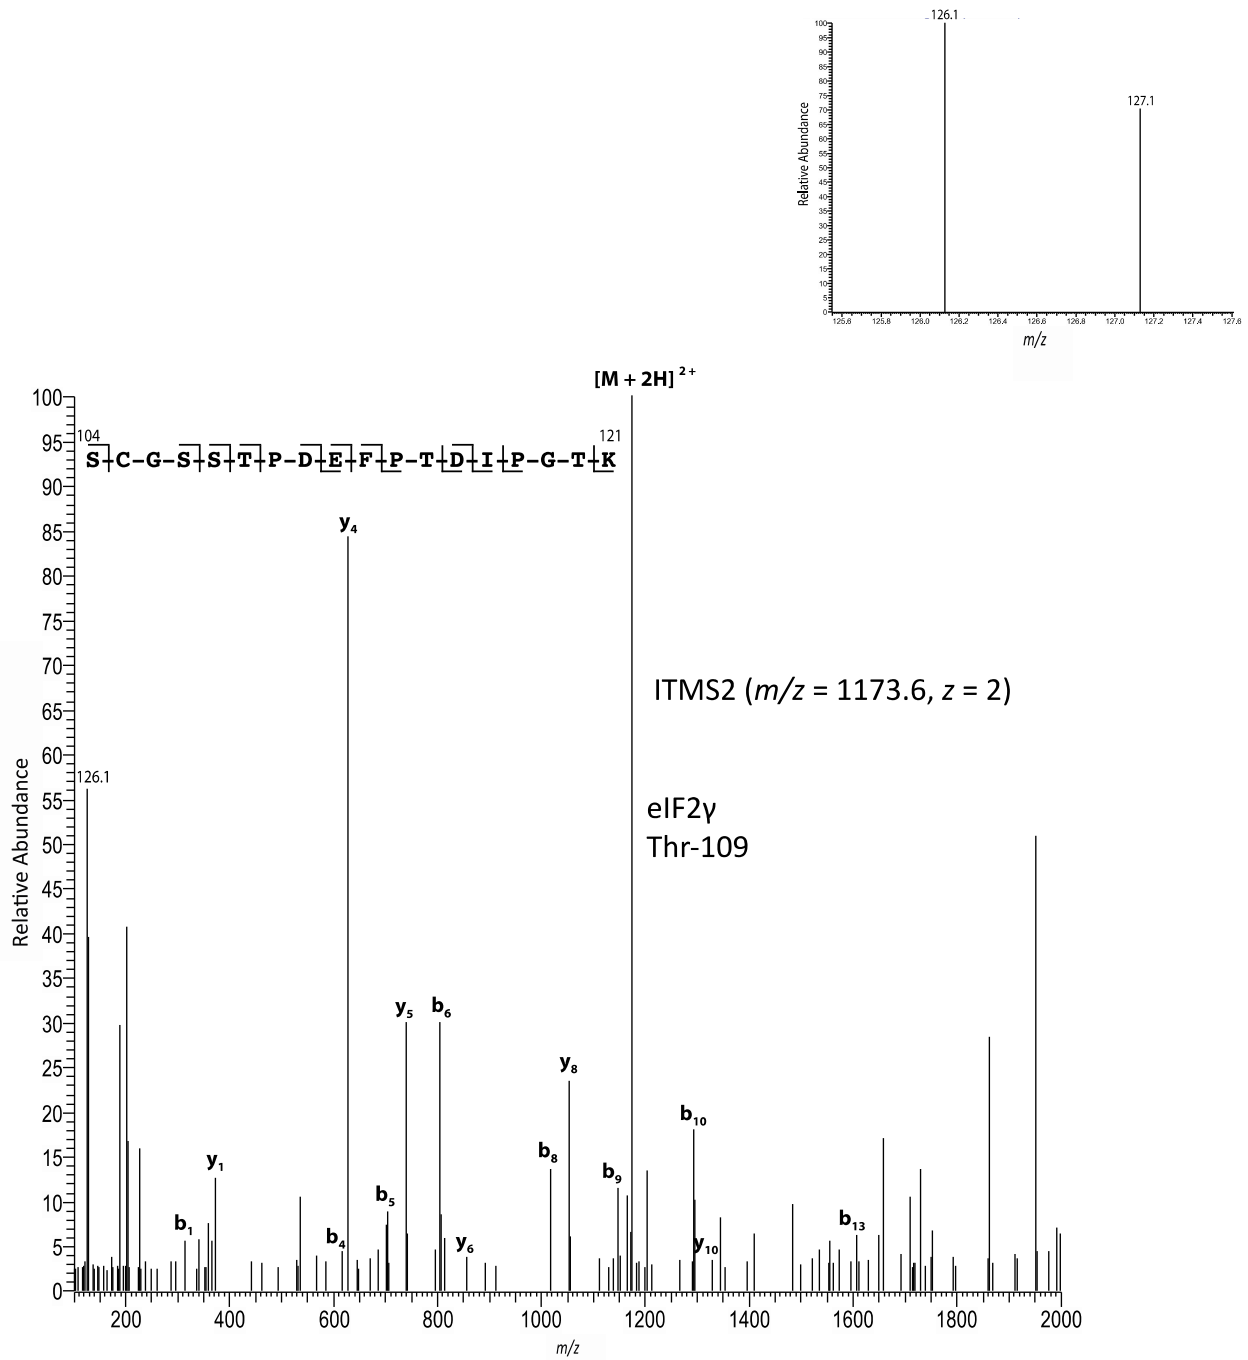

**Figure S7.** Spectrum corresponding to the quantification of phosphorylation of Ser-412 and Thr-413 for eIF2 $\gamma$ . Inset in upper right corner is a zoom in view of the reporter TMT ions.

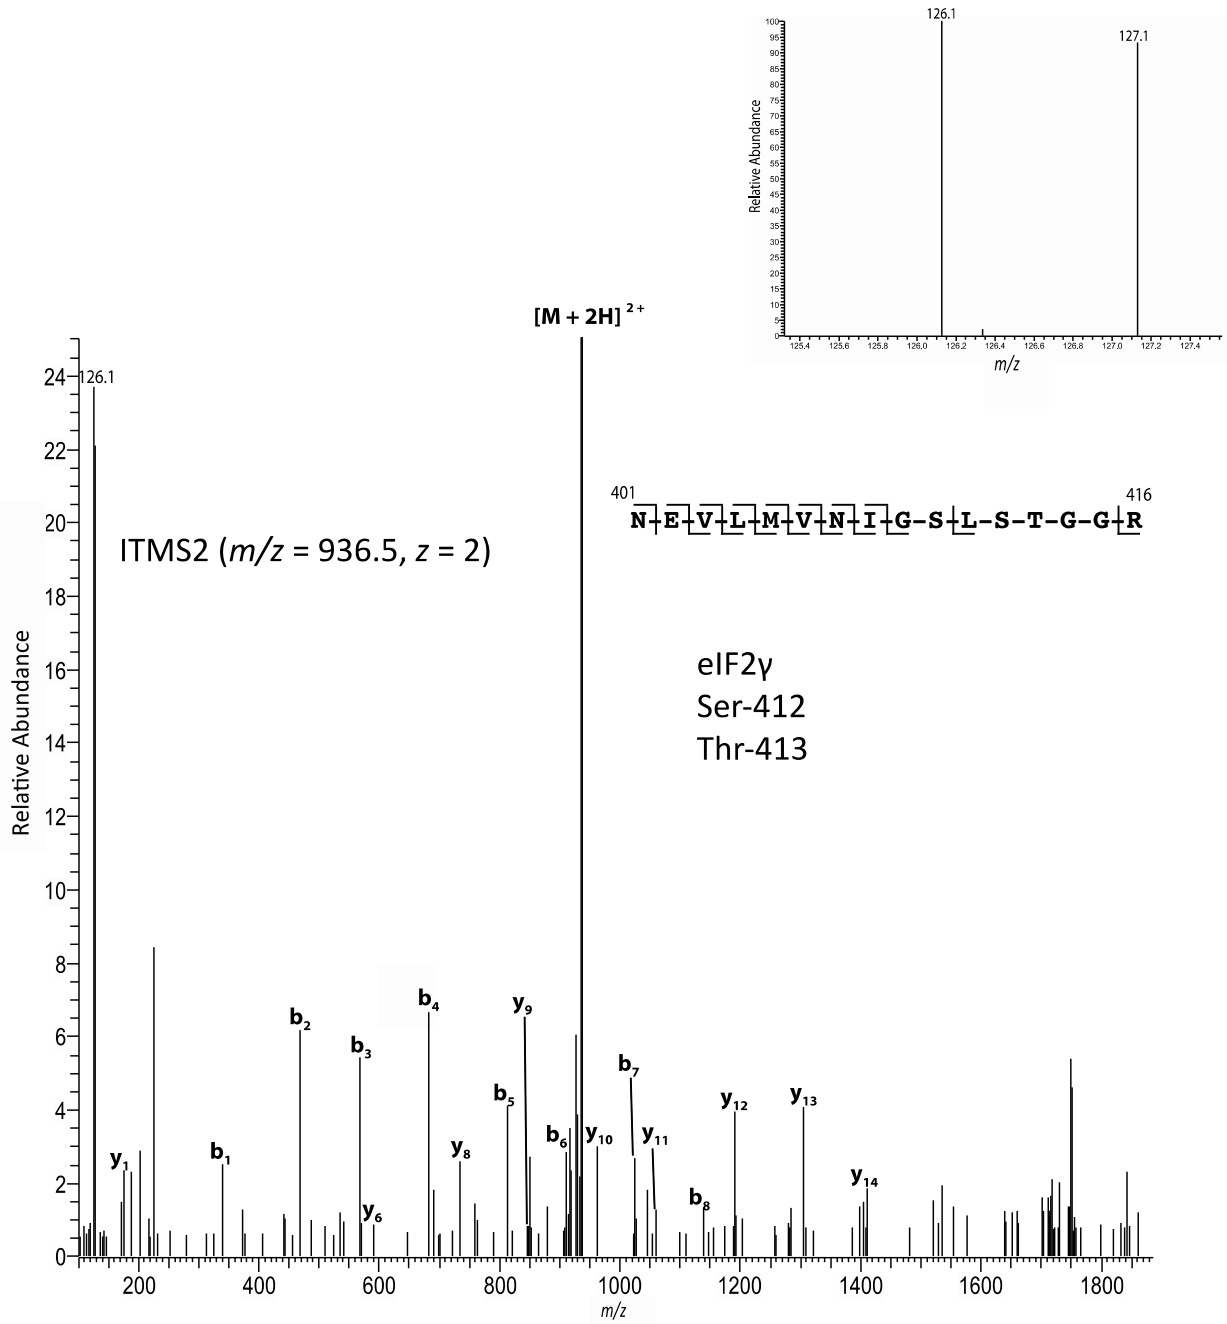

**Figure S8.** Spectrum corresponding to the quantification of phosphorylation of Ser-418 for eIF2 $\gamma$ . Inset in upper right corner is a zoom in view of the reporter TMT ions.

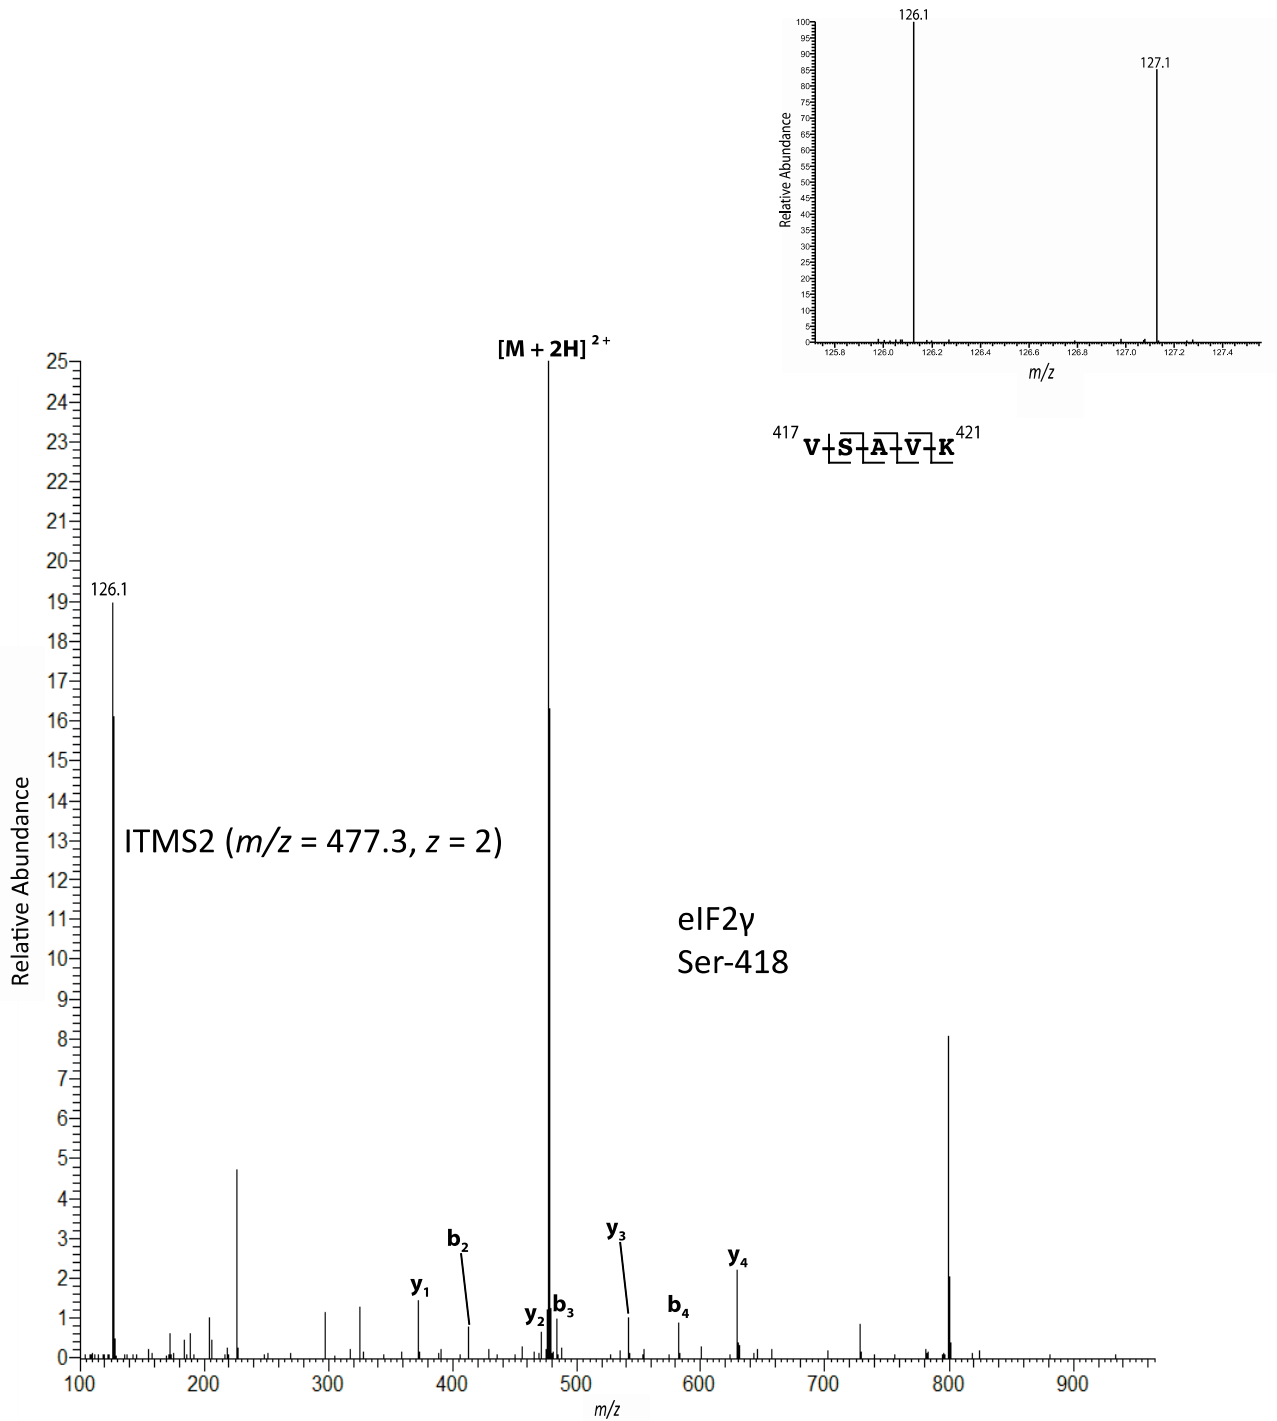

**Figure S9.** Spectrum corresponding to the quantification of phosphorylation of Thr-435 for eIF2 $\gamma$ . Inset in upper right corner is a zoom in view of the reporter TMT ions.

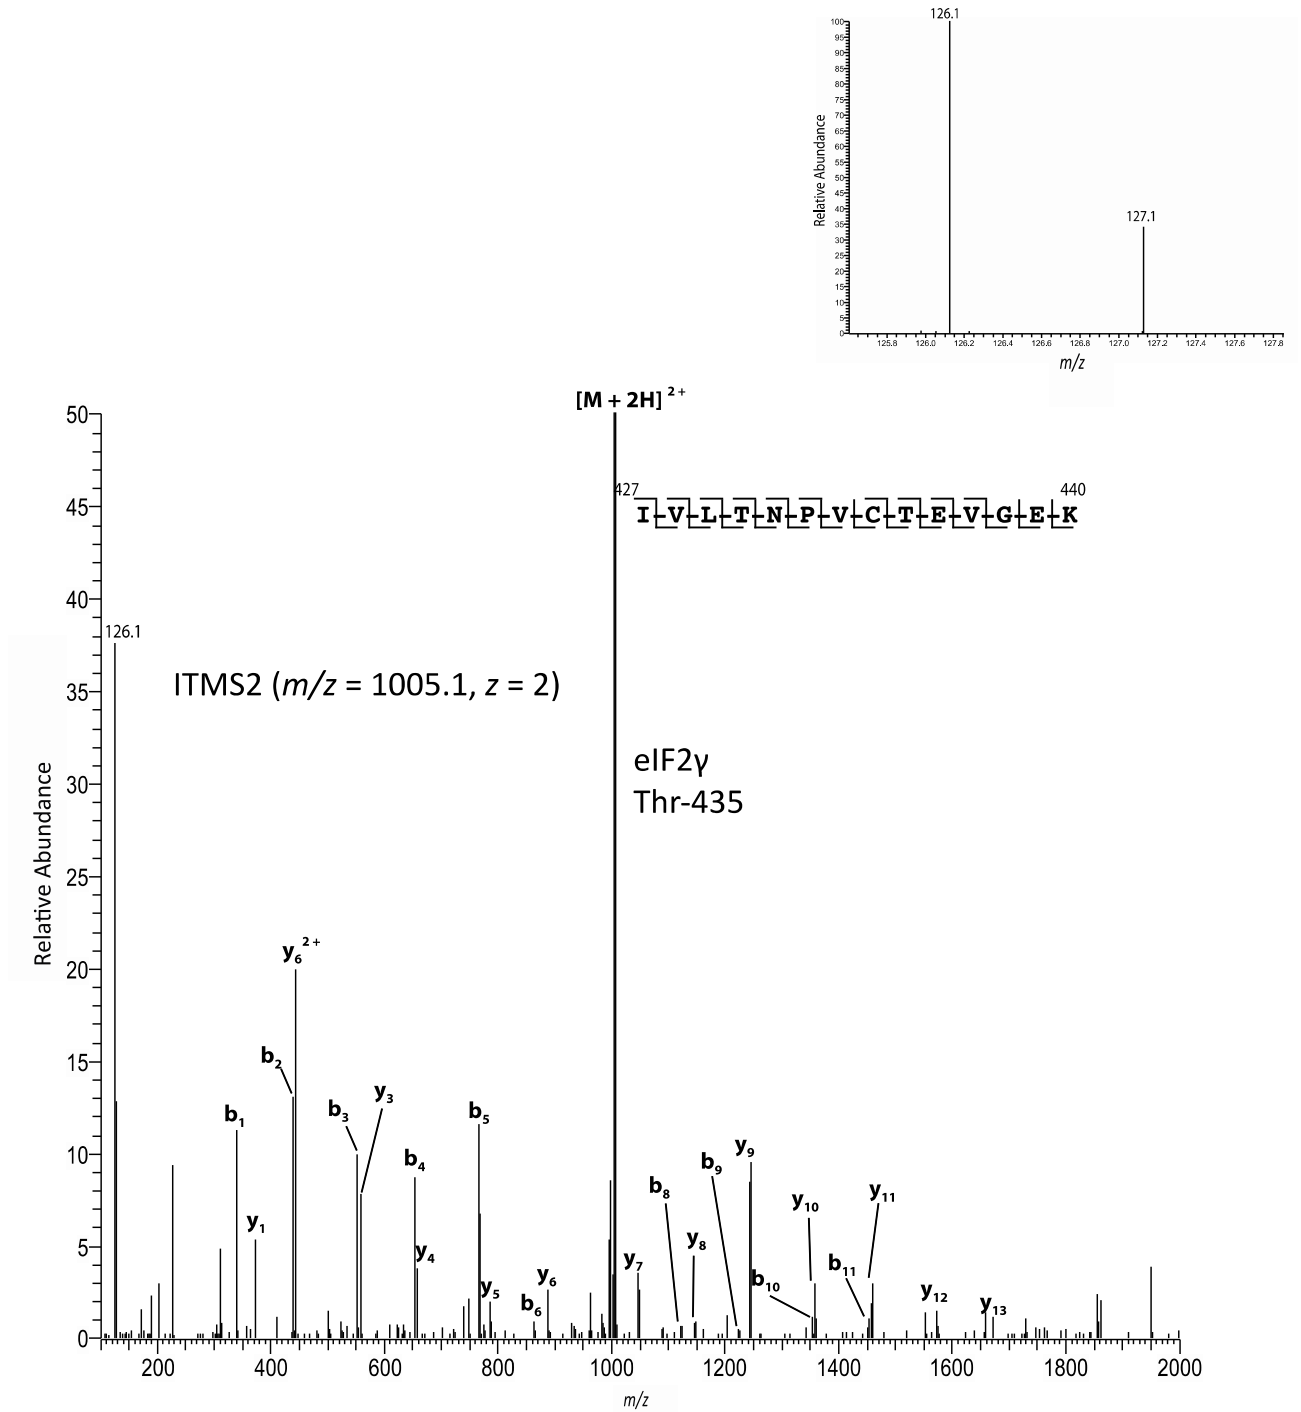

**Figure S10.** Spectrum corresponding to the quantification of phosphorylation of Ser-881 for eIF3a. Inset in upper right corner is a zoom in view of the reporter TMT ions.

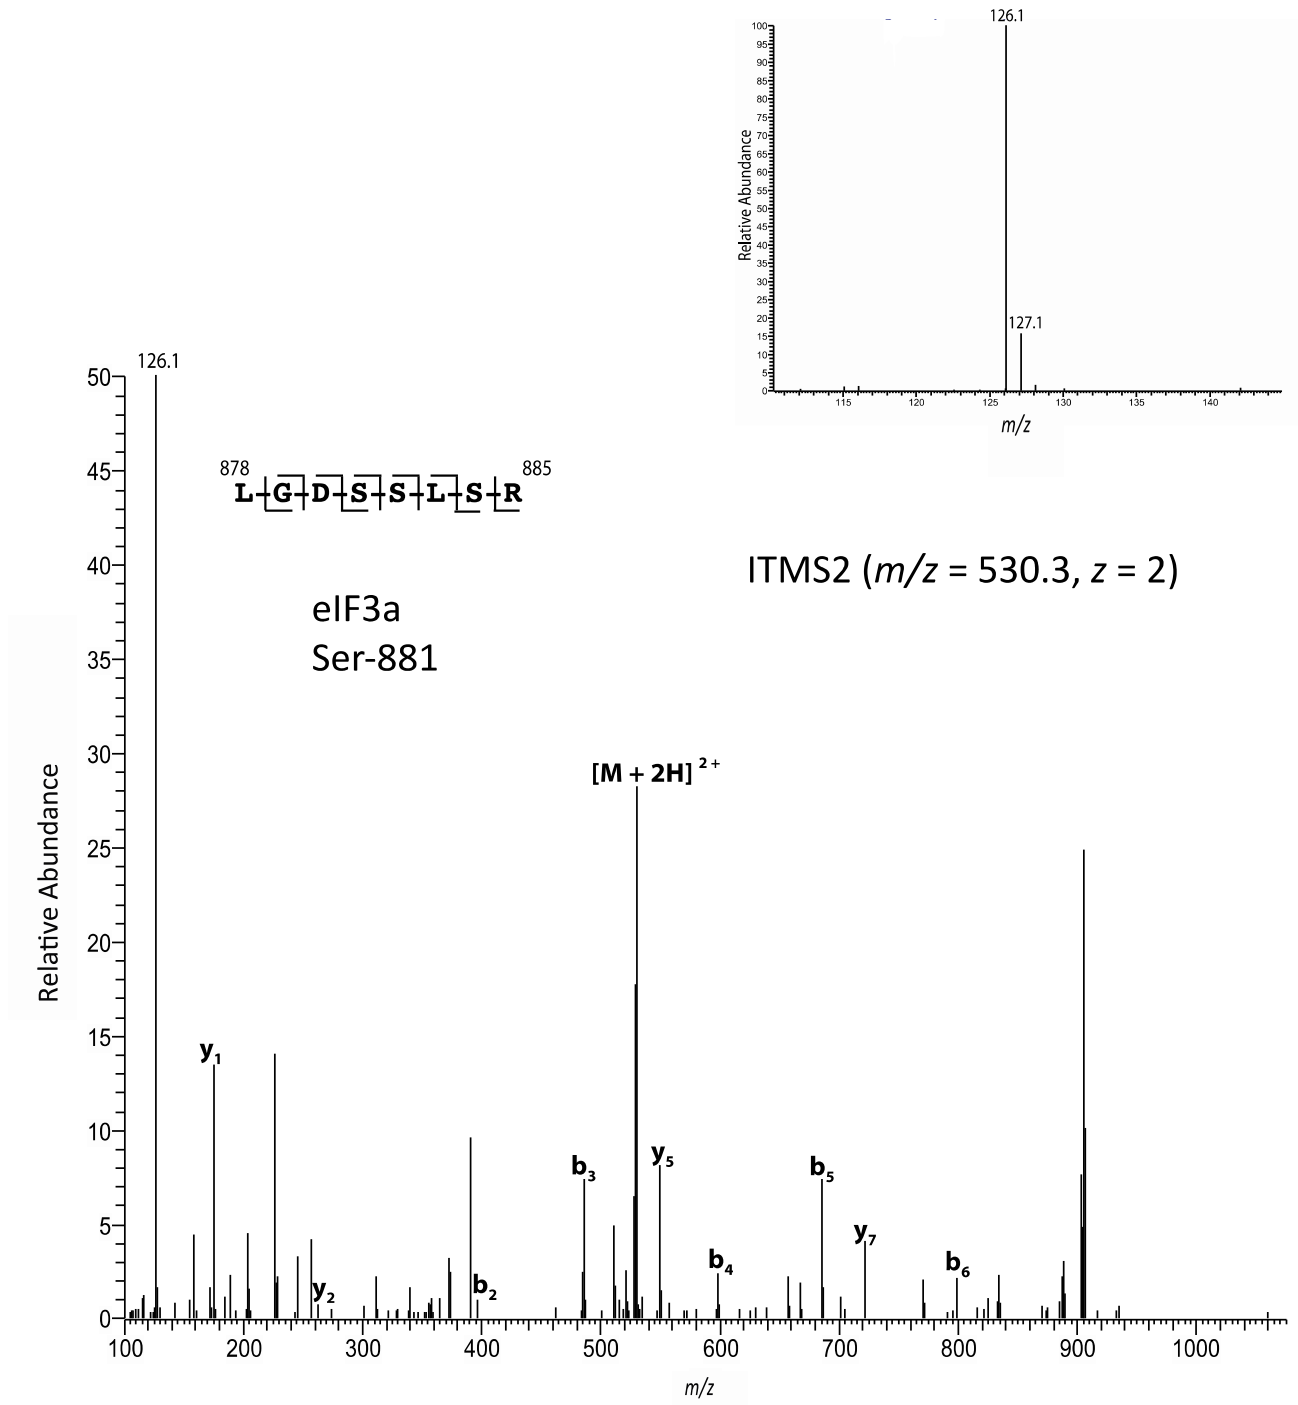

**Figure S11.** Spectrum corresponding to the quantification of phosphorylation of Ser-1364 for eIF3a. Inset in upper right corner is a zoom in view of the reporter TMT ions.

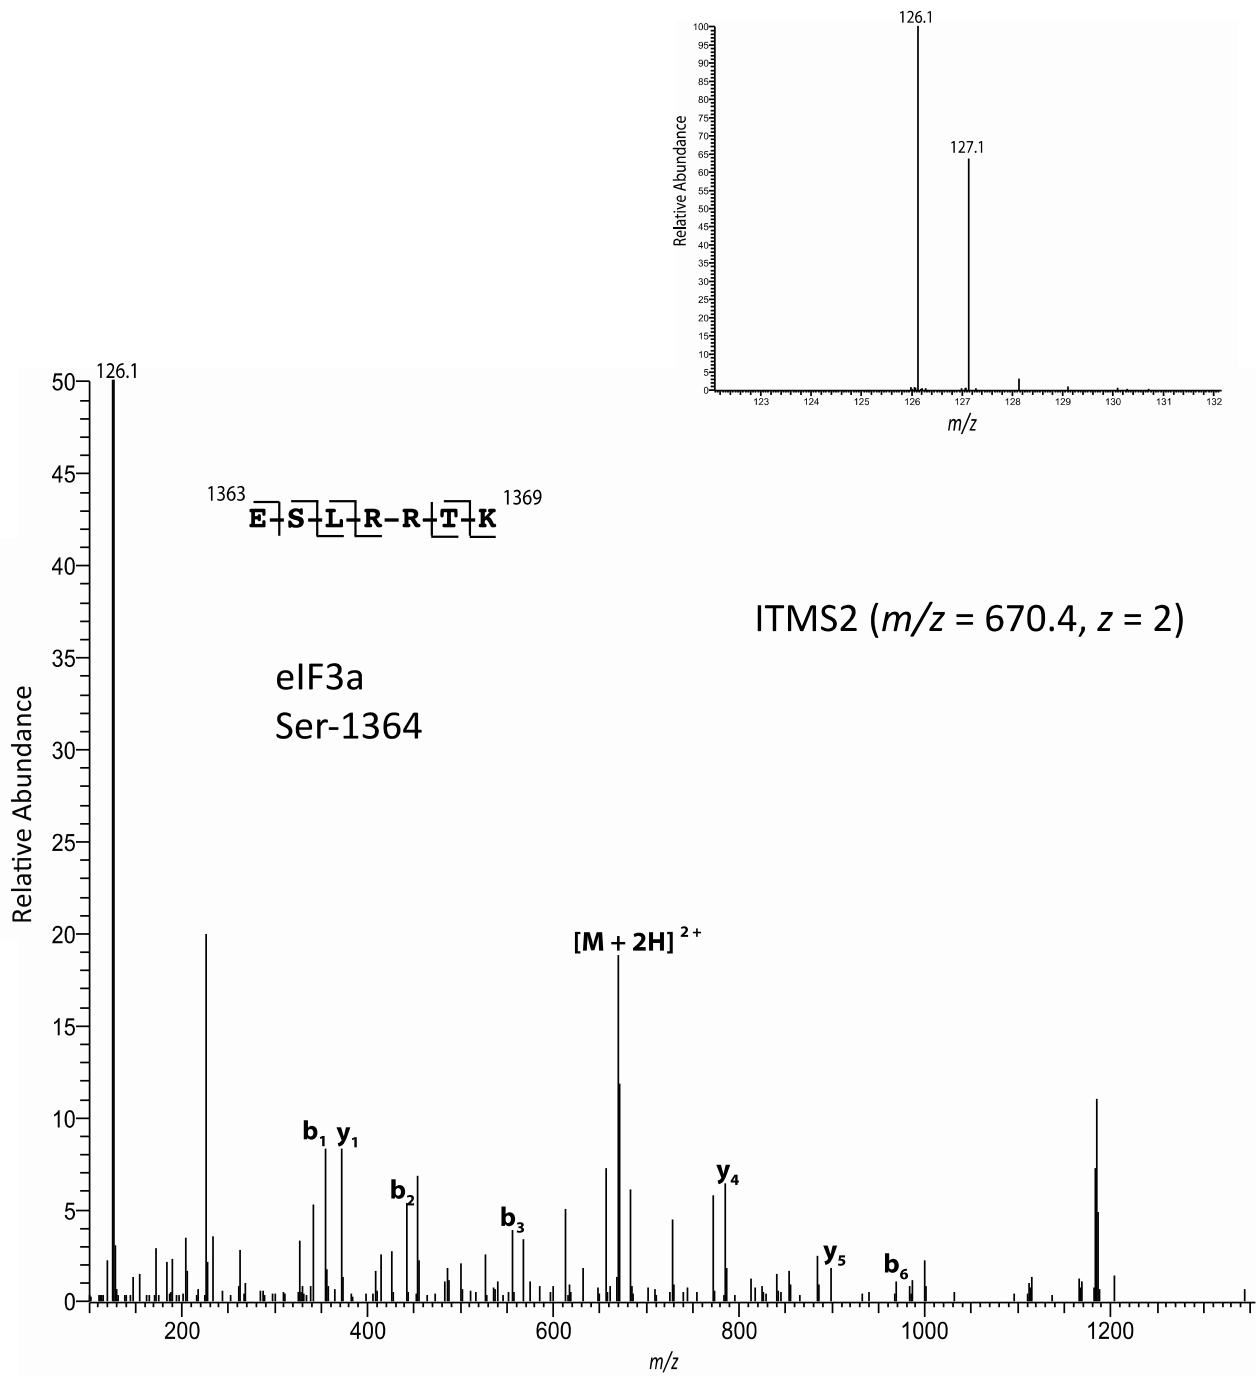

ITMS2 ( $m/z = 937.4$ ,  $z = 5$ )

68 TEPAAEAEAASGPSESPSPPAAEELPGSHAEPPVPAQGEAPGEQAR 113

eIF3b  
Ser-83  
Ser-85

Mass spectrum showing relative abundance versus  $m/z$ . The base peak is at  $m/z$  126.1. Other labeled peaks include  $y_6$ ,  $b_6$ ,  $y_9$ ,  $b_5$ ,  $y_7$ ,  $b_4$ ,  $y_5$ ,  $y_3$ ,  $b_2$ ,  $y_8$ ,  $b_7$ ,  $b_8$ ,  $y_{10}$ ,  $b_9$ ,  $y_{11}$ ,  $b_{10}$ ,  $y_{12}$ ,  $b_{11}$ ,  $b_{12}$ ,  $y_{15}$ , and a large peak at  $m/z$  1942.

**Figure S13.** Spectrum corresponding to the quantification of phosphorylation of Ser-125 for eIF3b. Inset in upper right corner is a zoom in view of the reporter TMT ions.

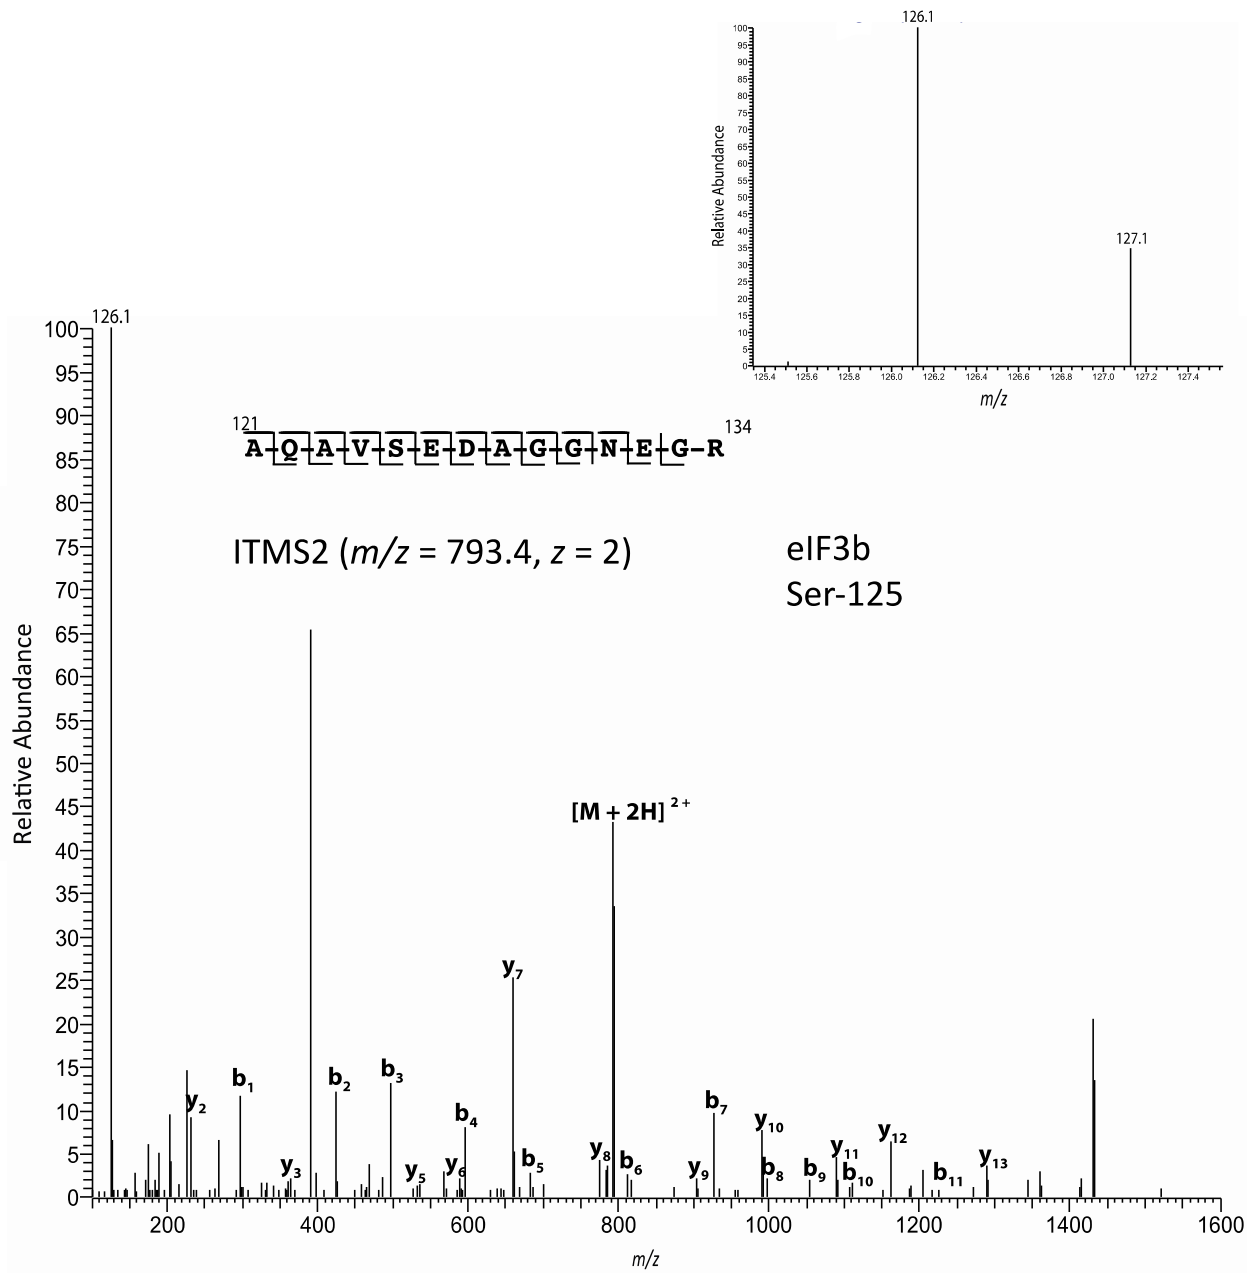

**Figure S14.** Spectrum corresponding to the quantification of phosphorylation of Thr-524 for eIF3c. Inset in upper right corner is a zoom in view of the reporter TMT ions.

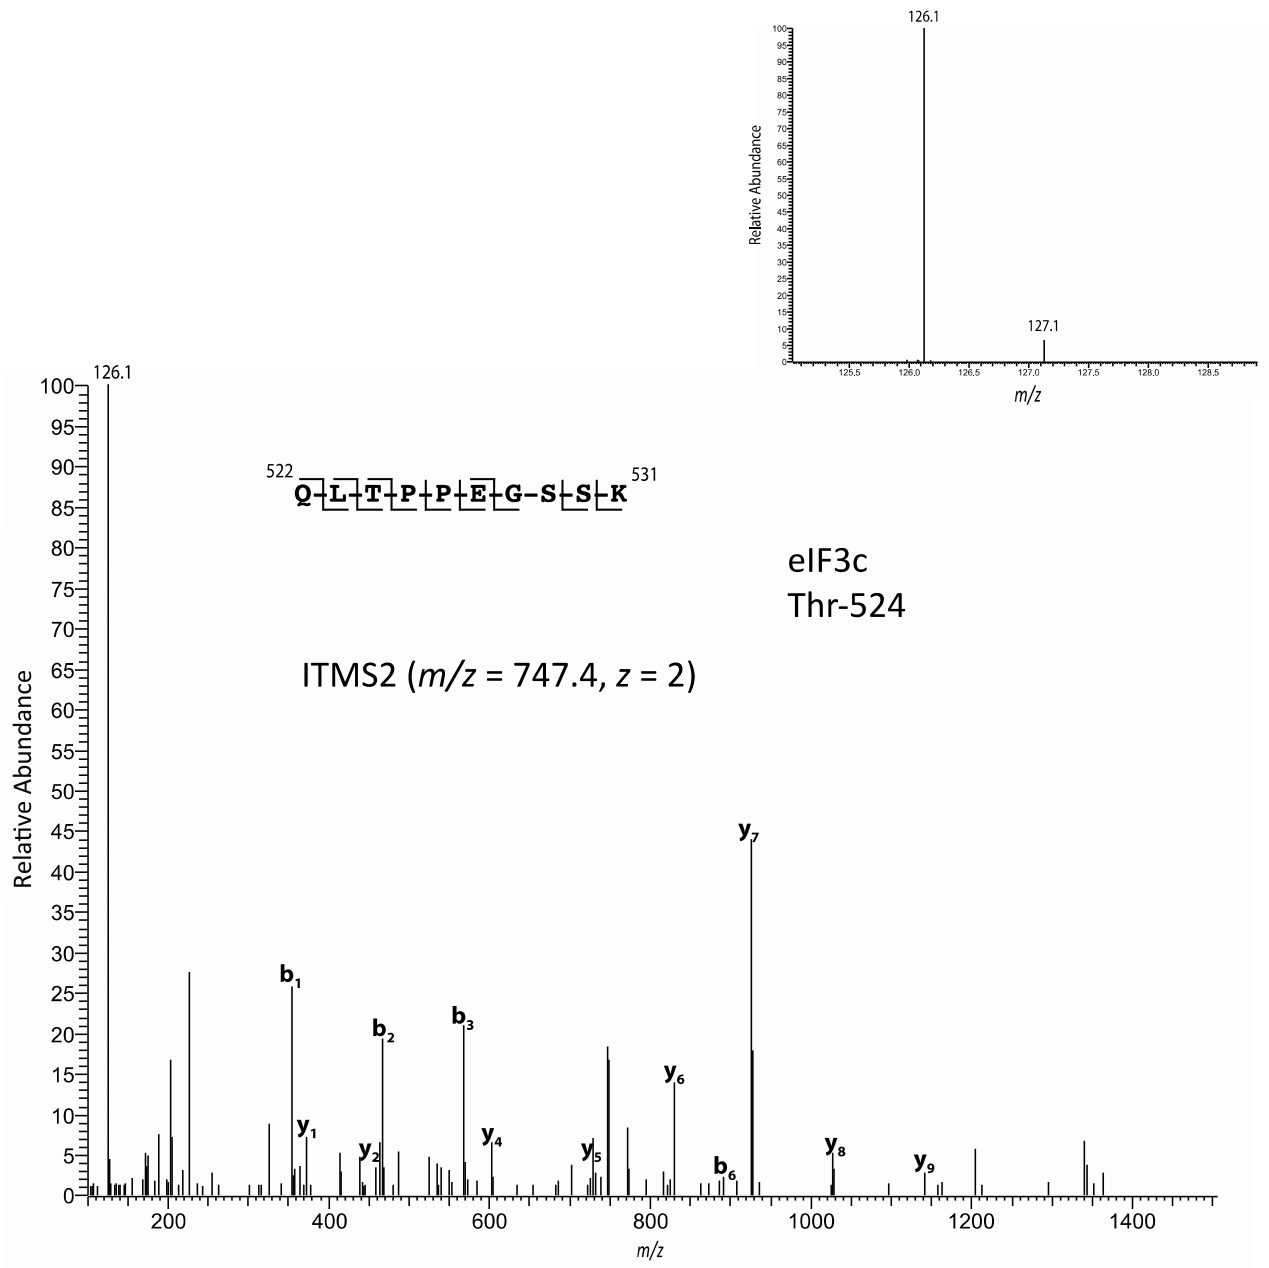

**Figure S15.** Spectrum corresponding to the quantification of phosphorylation of Thr-41 and Ser-42 for eIF3g. Inset in upper right corner is a zoom in view of the reporter TMT ions.

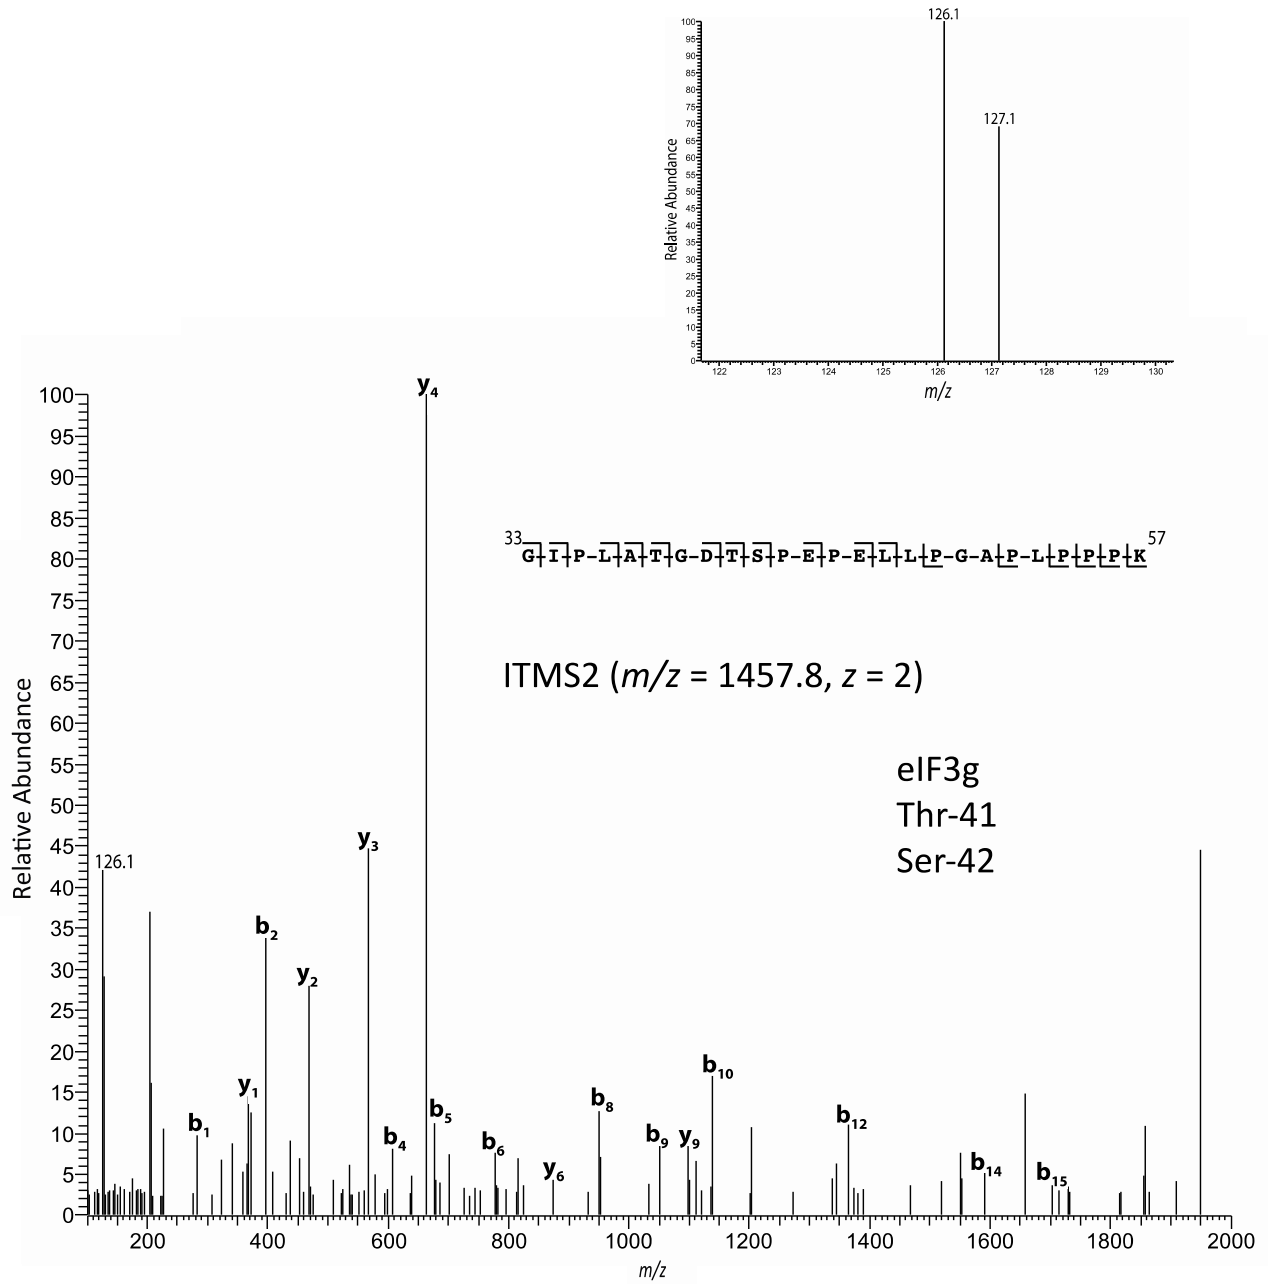

**Figure S16.** Spectrum corresponding to the quantification of phosphorylation of Ser-183 for eIF3h. Inset in upper right corner is a zoom in view of the reporter TMT ions.

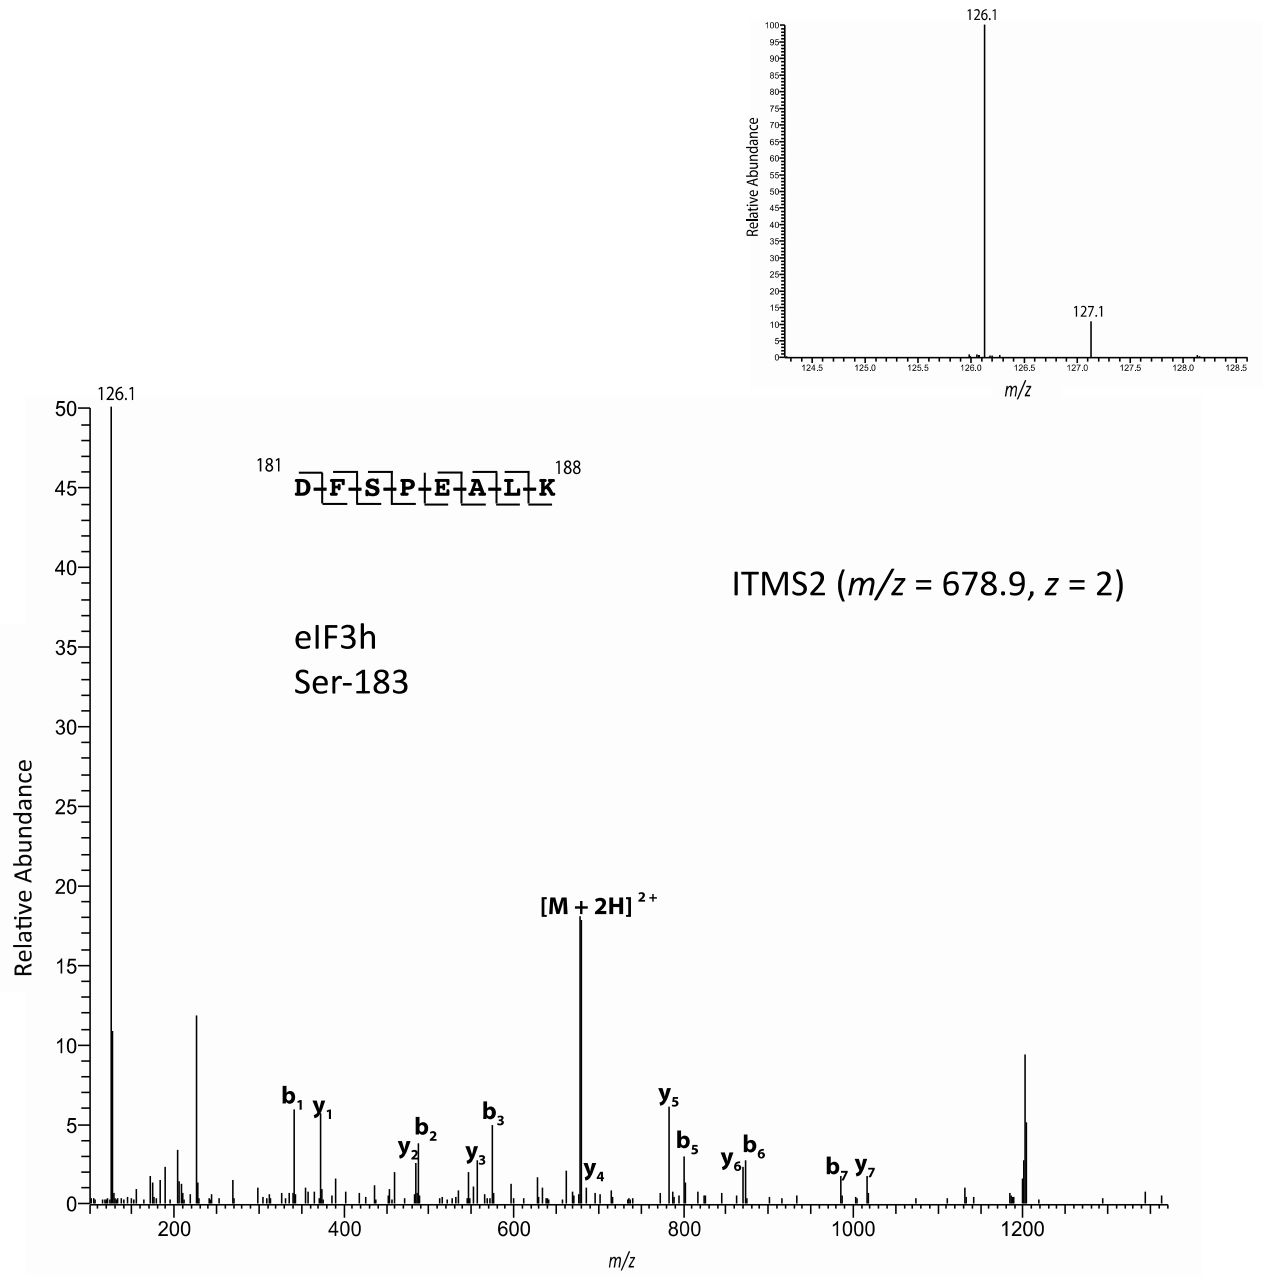

**Figure S17.** Spectrum corresponding to the quantification of phosphorylation of Thr-109 for eIF3j. Inset in upper right corner is a zoom in view of the reporter TMT ions.

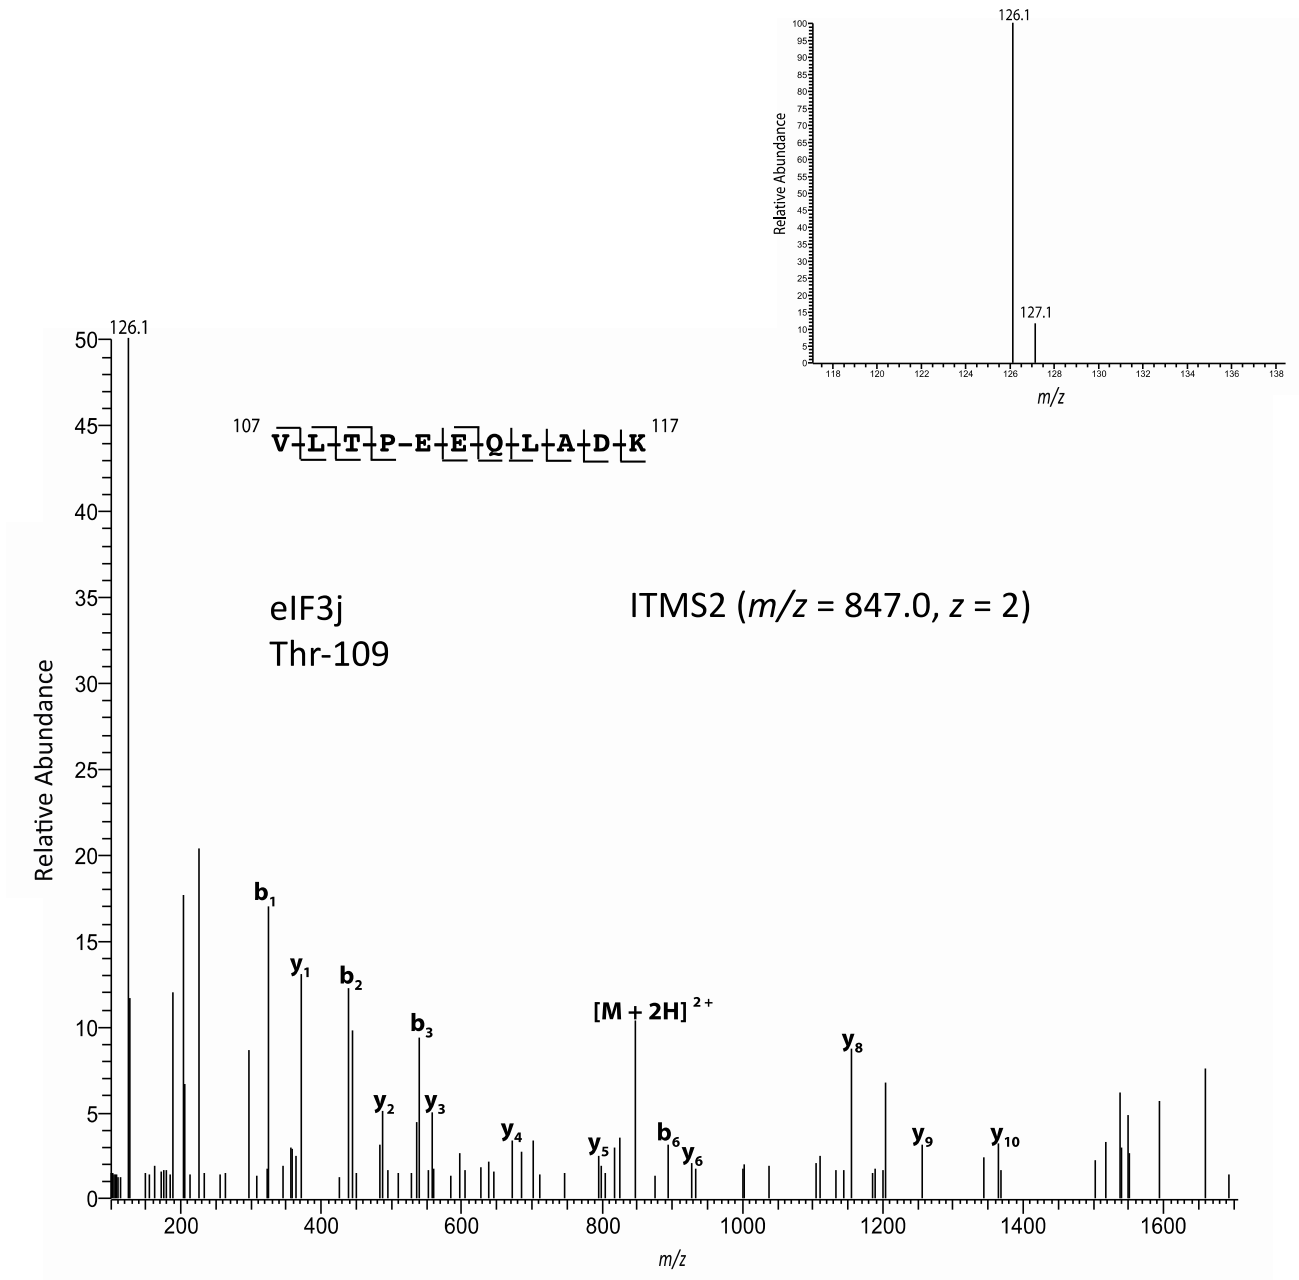

**Figure S18.** Spectrum corresponding to the quantification of phosphorylation of Thr-647 for eIF4G. Inset in upper right corner is a zoom in view of the reporter TMT ions.

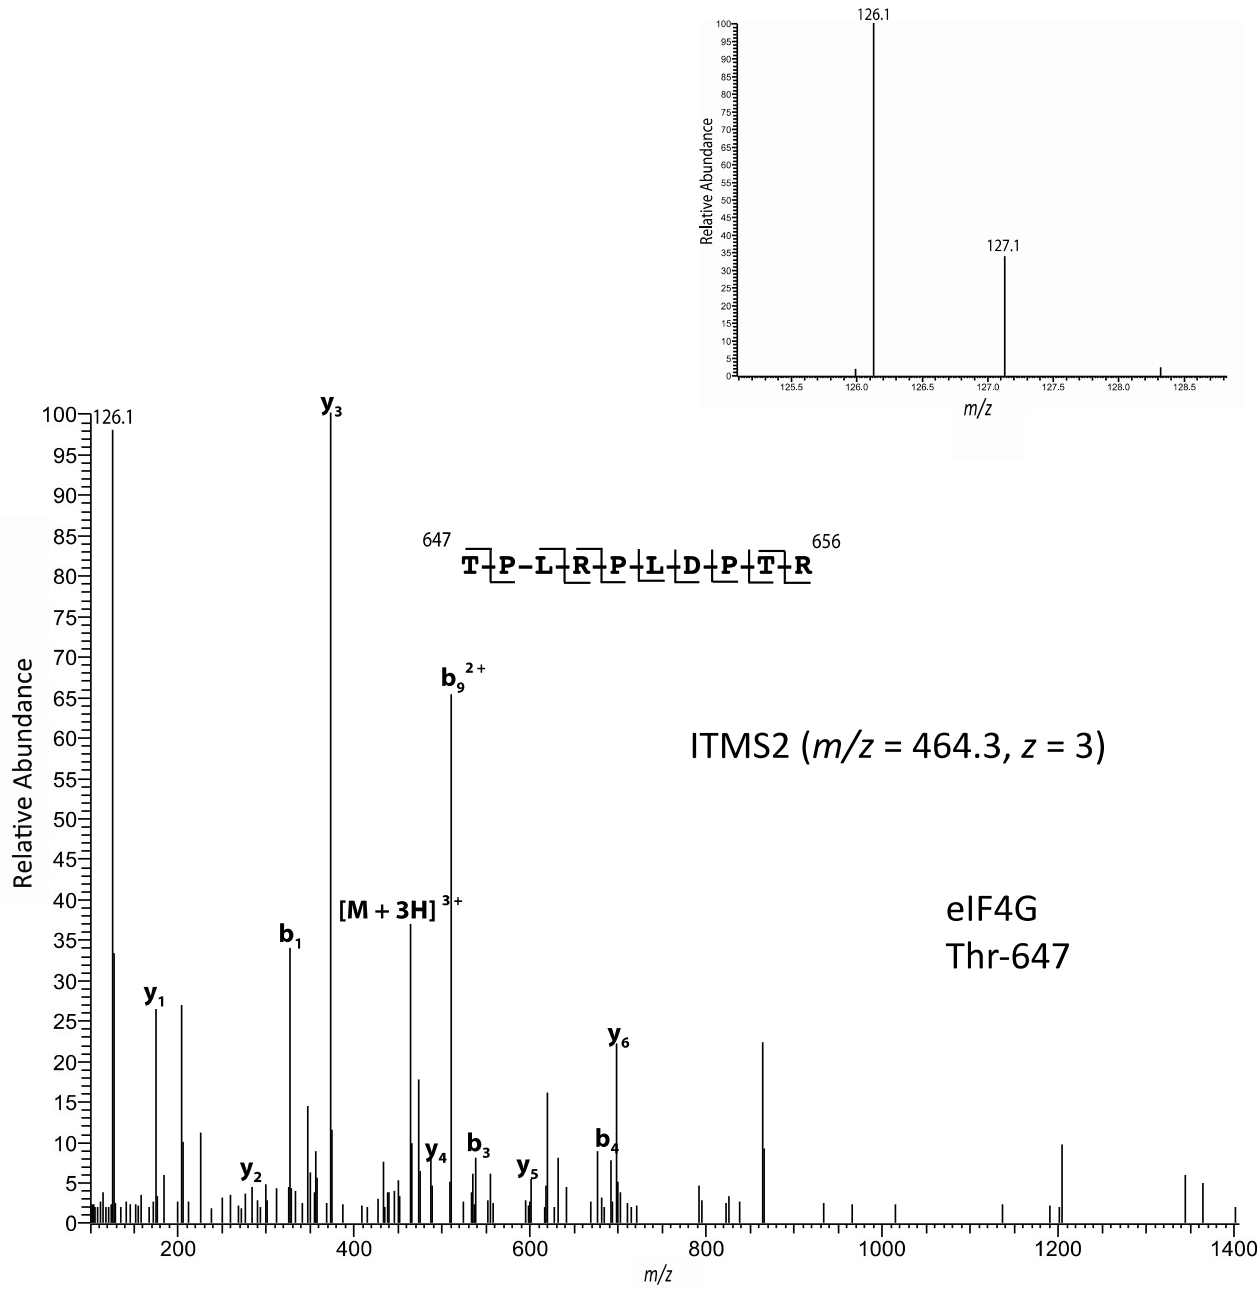

**Figure S19.** Spectrum corresponding to the quantification of phosphorylation of Ser-1028 for eIF4G. Inset in upper right corner is a zoom in view of the reporter TMT ions.

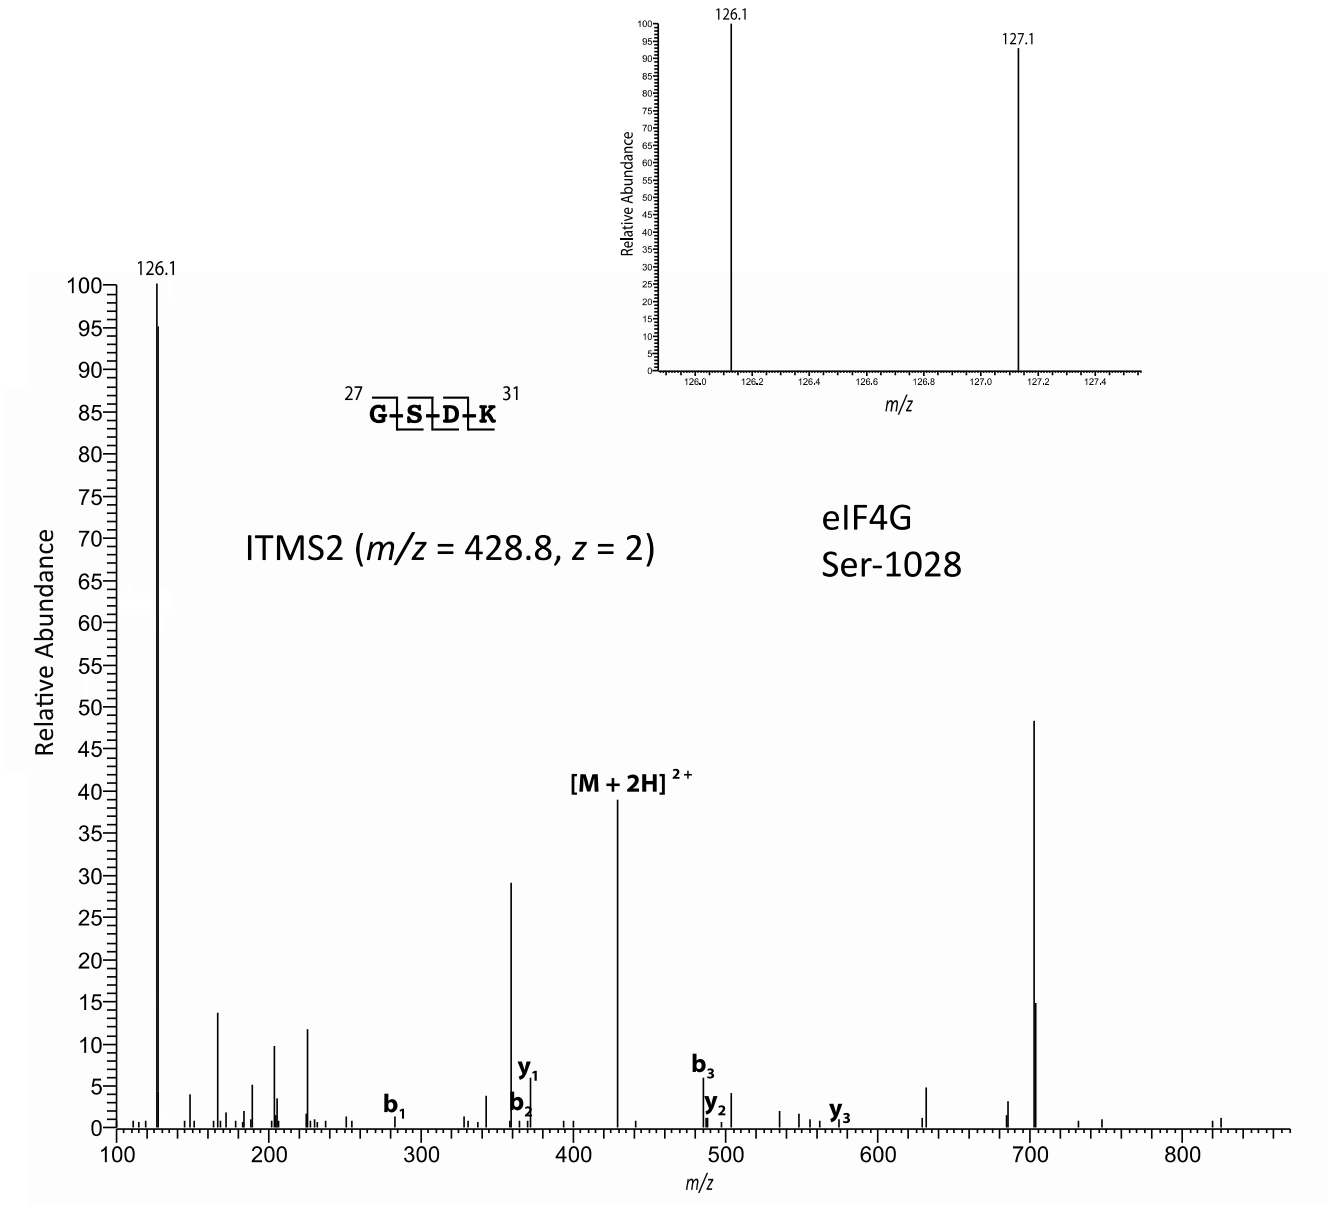

**Figure S20.** Spectrum corresponding to the quantification of phosphorylation of Ser-1144 and Ser-1147 for eIF4G. Inset in upper right corner is a zoom in view of the reporter TMT ions.

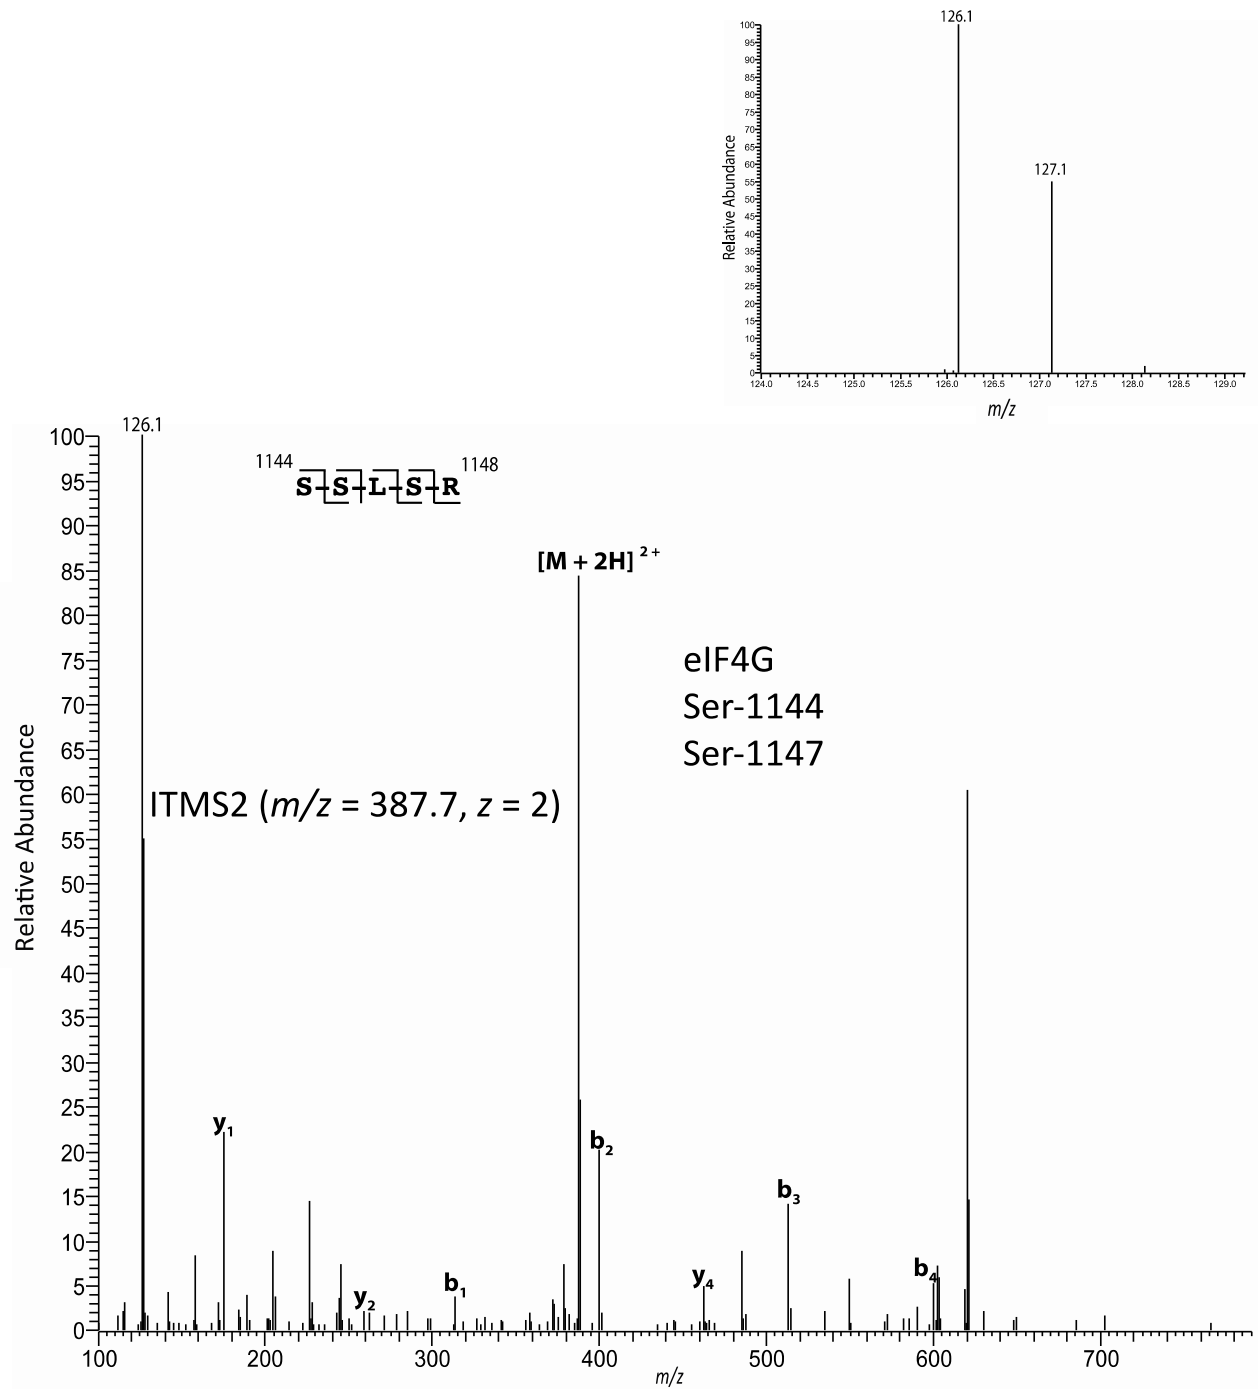

**Figure S21.** Spectrum corresponding to the quantification of phosphorylation of Ser-1185 and Ser-1187 for eIF4G. Inset in upper right corner is a zoom in view of the reporter TMT ions.

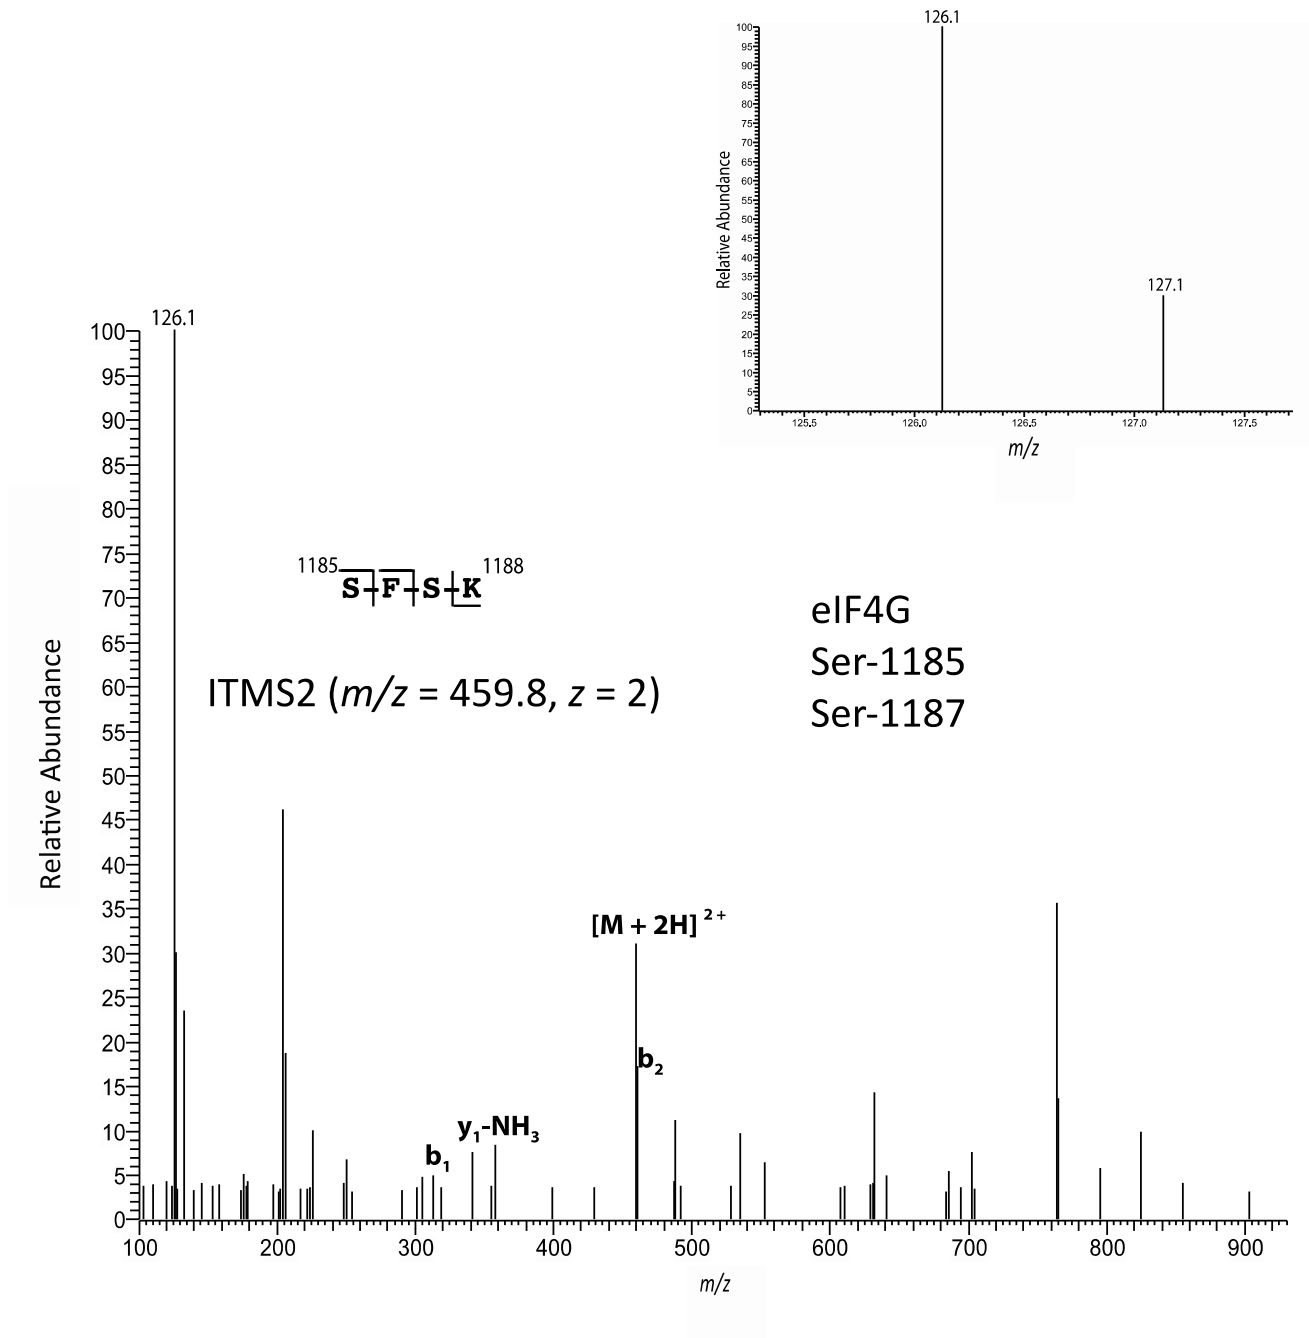

**Figure S22.** Spectrum corresponding to the quantification of phosphorylation of Ser-1209 and Thr-1211 for eIF4G. Inset in upper right corner is a zoom in view of the reporter TMT ions.

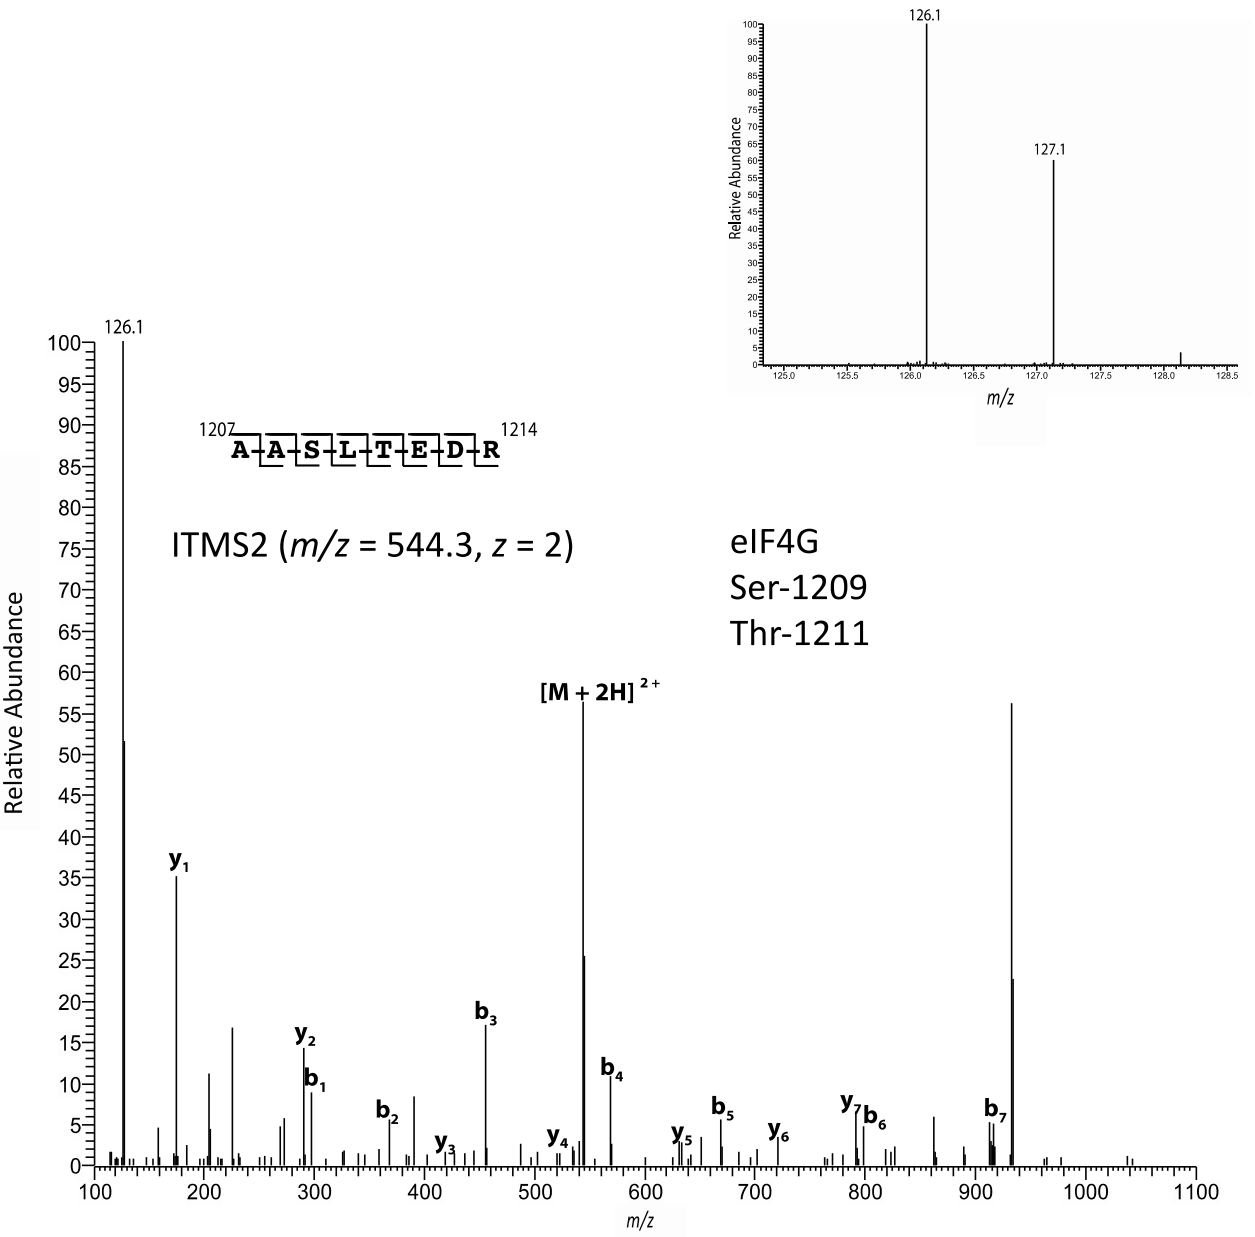

**Figure S23.** Spectrum corresponding to the quantification of phosphorylation of Ser-1231 for eIF4G. Inset in upper right corner is a zoom in view of the reporter TMT ions.

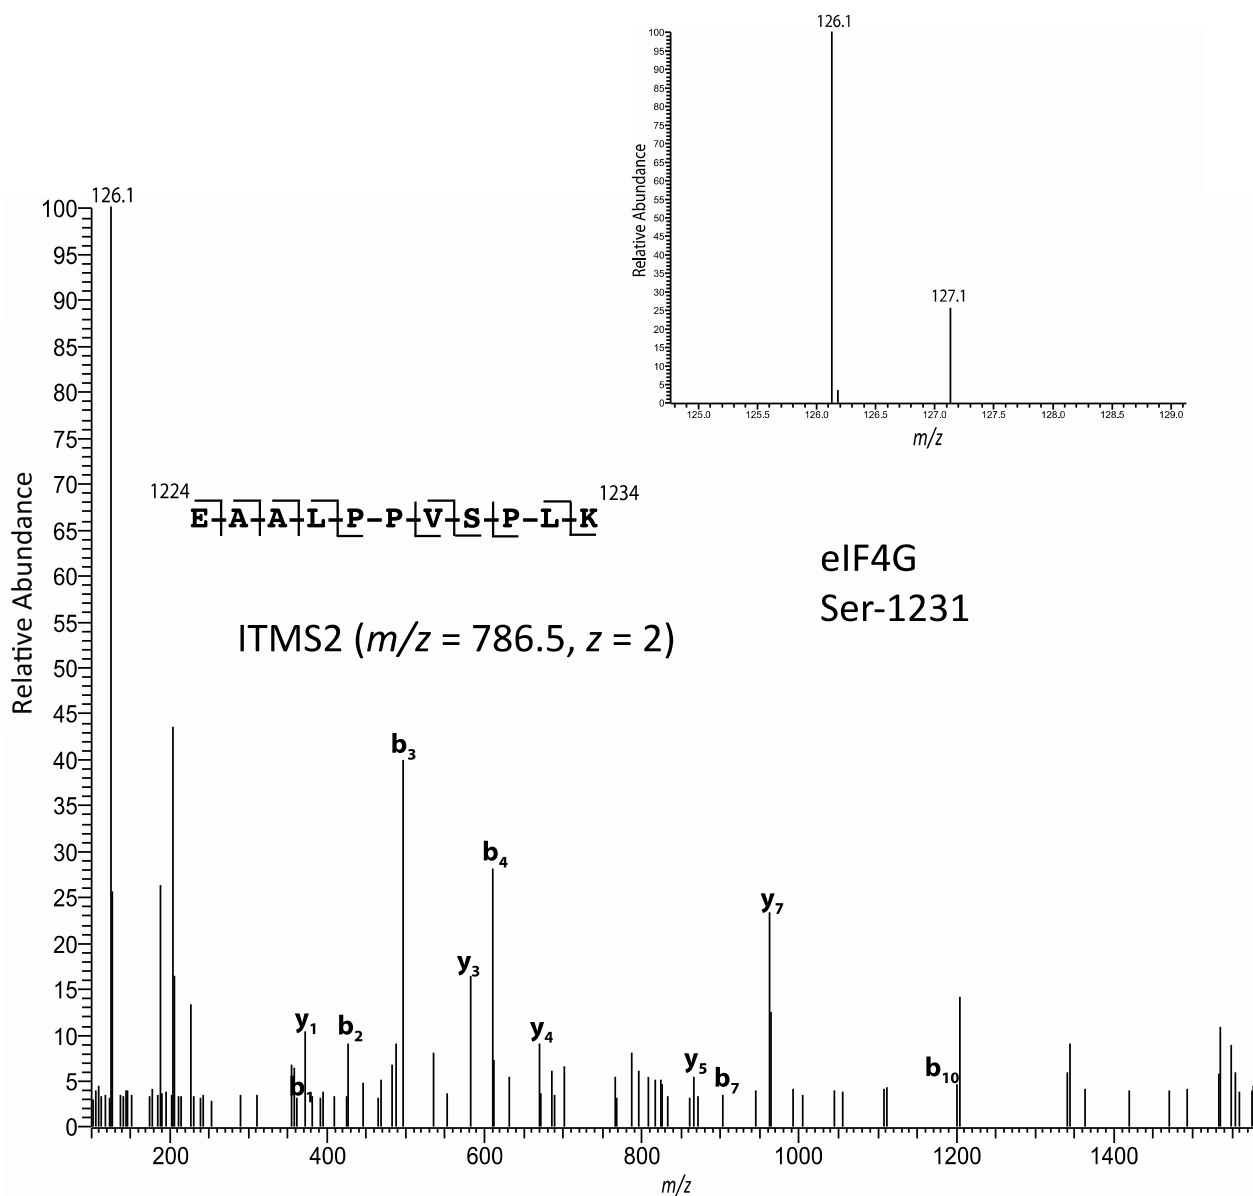

**Figure S24.** Spectrum corresponding to the quantification of phosphorylation of Thr-1425 and Ser-1430 for eIF4G. Inset in upper right corner is a zoom in view of the reporter TMT ions.

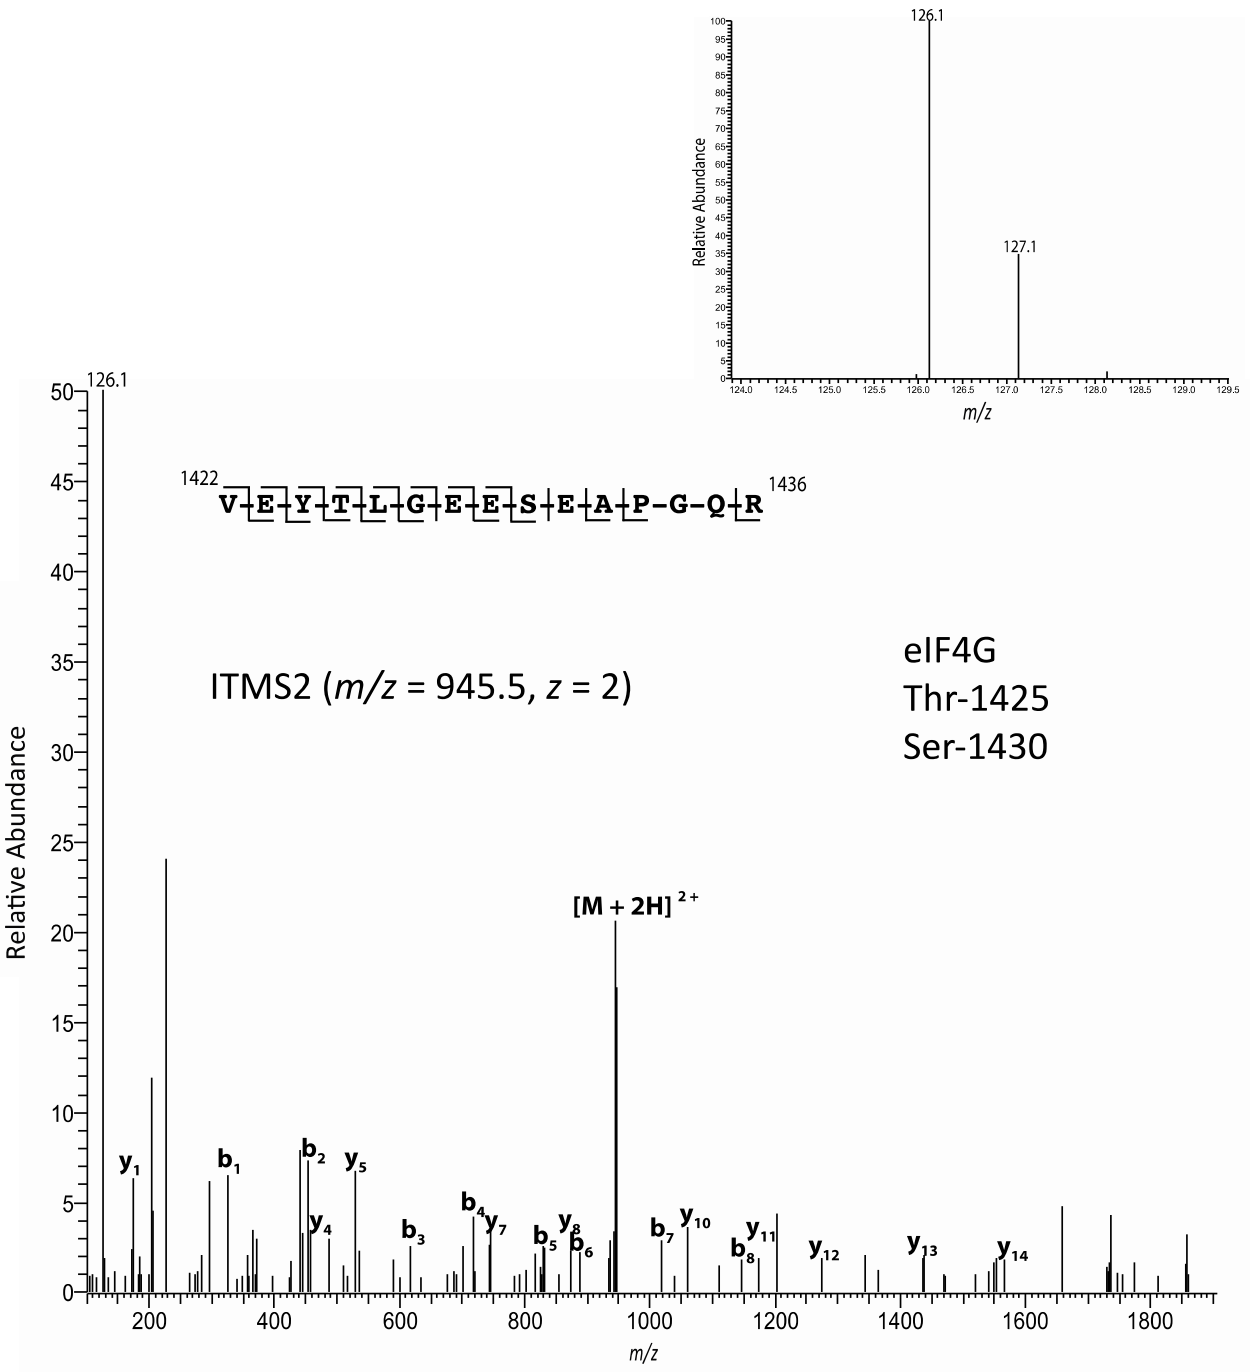

Supplement: Supplementary File 1 [file ijms-15-11523-s001.pdf]
